# Supplementary material for: Dimensionality reduction methods for extracting functional networks from large‐scale CRISPR screens
Source: PubMed Central journal article supplement (PMC10632734; doi:10.15252/msb.202311657), 2023-09-26
Supplement: MSB-19-e11657-s001.pdf [file MSB-19-e11657-s001.pdf]

# Appendix Materials

## Manuscript Title

**Dimensionality reduction methods for extracting functional networks from large-scale CRISPR screens**

## Authors

Arshia Zernab Hassan<sup>1\*</sup>, Henry N. Ward<sup>2\*</sup>, Mahfuzur Rahman<sup>1</sup>, Maximilian Billmann<sup>1,3</sup>, Yoonkyu Lee<sup>2</sup>, Chad L. Myers<sup>1,2</sup>

\*These authors contributed equally to this work

<sup>1</sup> Department of Computer Science and Engineering, University of Minnesota – Twin Cities, Minneapolis, Minnesota, USA

<sup>2</sup> Bioinformatics and Computational Biology Graduate Program, University of Minnesota – Twin Cities, Minneapolis, Minnesota, USA

<sup>3</sup> Institute of Human Genetics, University of Bonn, School of Medicine and University Hospital Bonn, Bonn, Germany

## Corresponding author

Chad L. Myers

Email: [chadm@umn.edu](mailto:chadm@umn.edu)

## Table of contents

| <b>Appendix Contents</b> | <b>Page Number</b> |
|--------------------------|--------------------|
| Appendix Figure S1       | 1                  |
| Appendix Figure S2       | 3                  |
| Appendix Figure S3       | 5                  |
| Appendix Figure S4       | 7                  |
| Appendix Figure S5       | 9                  |
| Appendix Figure S6       | 11                 |
| Appendix Figure S7       | 13                 |
| Appendix Figure S8       | 15                 |
| Appendix Figure S9       | 17                 |
| Appendix Figure S10      | 19                 |
| Appendix Figure S11      | 21                 |
| Appendix Figure S12      | 23                 |
| Appendix Figure S13      | 25                 |
| Appendix Figure S14      | 27                 |
| Appendix Figure S15      | 29                 |
| Appendix Figure S16      | 31                 |
| Appendix Figure S17      | 33                 |
| References               | 35                 |

**A** PCA Reconstructed

PC=5

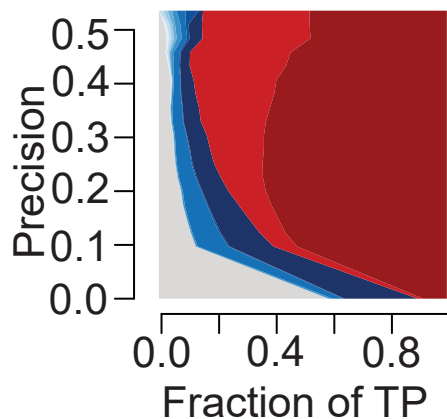

- 55S ribosome, mitochondrial
- Respiratory chain complex I (holoenzyme), mito.
- Spliceosome
- 17S U2 snRNP
- Ribosome, cytoplasmic
- Mediator complex
- GATB-GATC-QRSL1
- SAGA complex, GCN5-linked
- PAR-3-PAR-6B-PRKCI
- KNTC1-ZW10-ZWILCH
- Other complexes

**B** PCA Reconstructed

PC=9

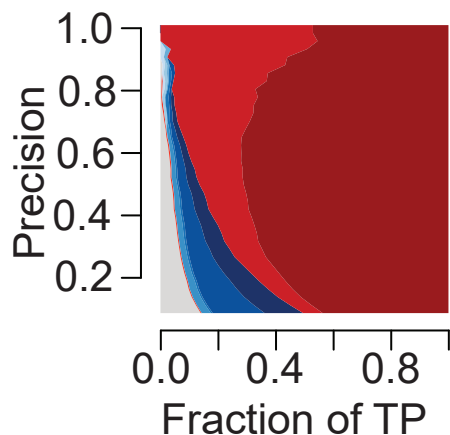

- 55S ribosome, mitochondrial
- Respiratory chain complex I (holoenzyme), mito.
- Ribosome, cytoplasmic
- Spliceosome
- STAGA complex, SPT3 linked
- PA700-20S-PA28
- TSC1-TSC2
- 26S proteasome
- 40S ribosomal subunit, cytoplasmic
- Cytochrome c oxidase, mitochondrial
- Other complexes

**C** PCA Reconstructed

PC=19

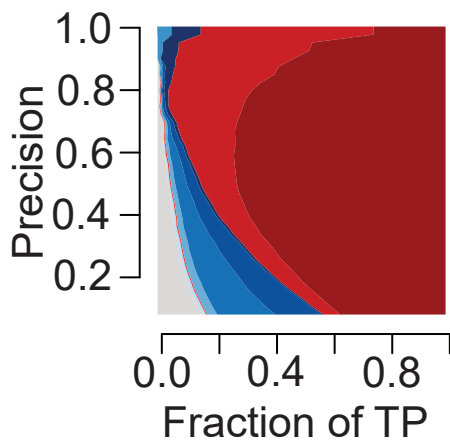

- 55S ribosome, mitochondrial
- Respiratory chain complex I (holoenzyme), mito.
- STAGA complex, SPT3 linked
- Ribosome, cytoplasmic
- Spliceosome
- TSC1-TSC2
- PA700-20S-PA28
- Cytochrome c oxidase, mitochondrial
- Arp2/3 protein
- Mediator complex
- Other complexes

**Appendix Figure S1:** Contribution diversity plot depicting true-positive (TP) pairs contributions from CORUM complexes in PCA-reconstructed DepMap 20Q2 (Data ref: Broad DepMap, 2020). The top ten contributing complexes are listed in the legend, with the light gray category representing all complexes represented at lower frequency. Note that figure panel A, B, and C are replicated from Figure 1E.

**A,** Contribution diversity plot from PCA-reconstructed DepMap data with the first 5 principal components.

**B,** Contribution diversity plot from PCA-reconstructed DepMap data with the first 9 principal components.

**C,** Contribution diversity plot from PCA-reconstructed DepMap data with the first 19 principal components.

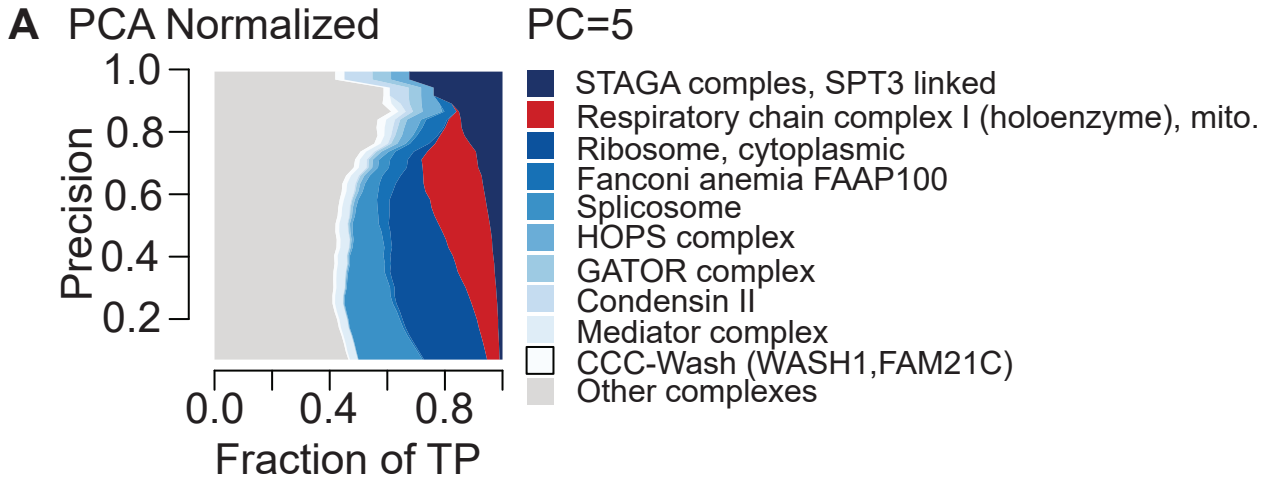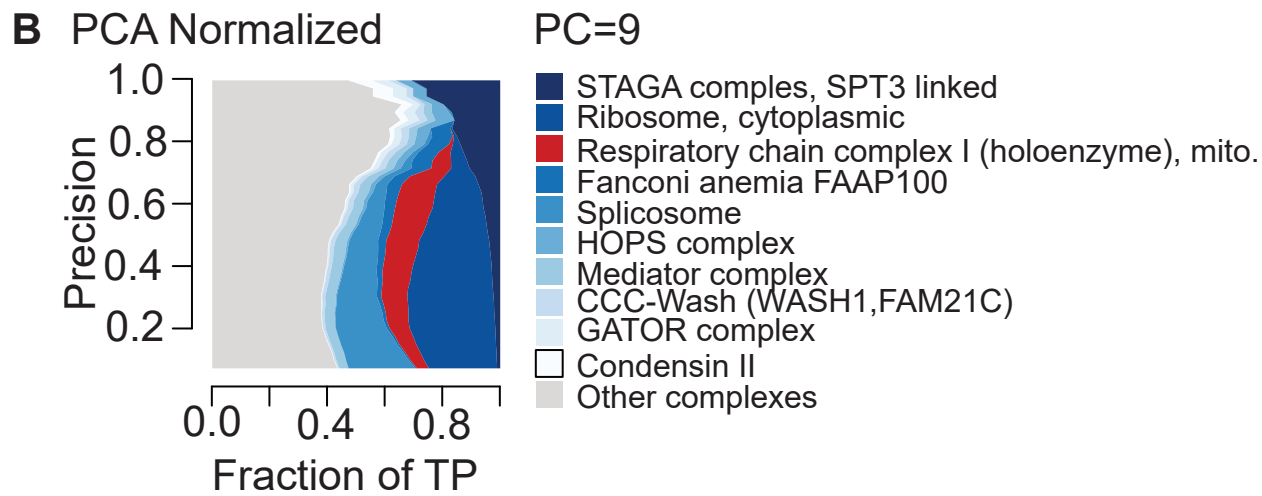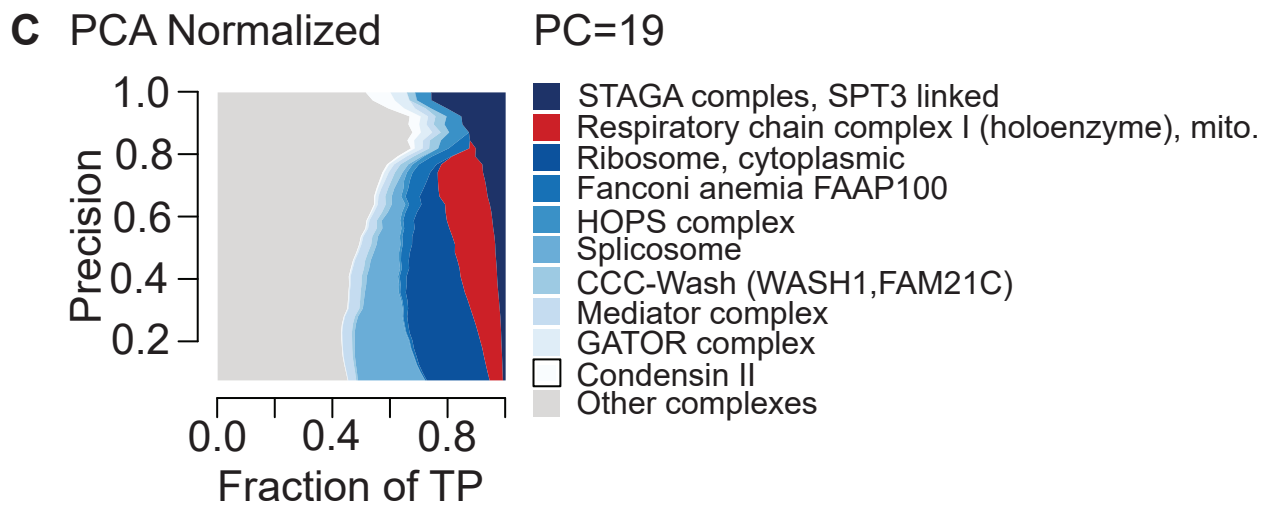

**Appendix Figure S2:** Contribution diversity plots depicting true-positive (TP) pairs contributions from CORUM complexes in PCA-normalized DepMap 20Q2 data (Data ref: Broad DepMap, 2020). The top ten contributing complexes are listed in the legend, with the light gray category representing all complexes represented at lower frequency. Note that figure panel A, B, and C are replicated from Figure 1E.

**A,** Contribution diversity plot from PCA-normalized DepMap data with the first 5 principal components removed.

**B,** Contribution diversity plot from PCA-normalized DepMap data with the first 9 principal components removed.

**C,** Contribution diversity plot from PCA-normalized DepMap data with the first 19 principal components removed.

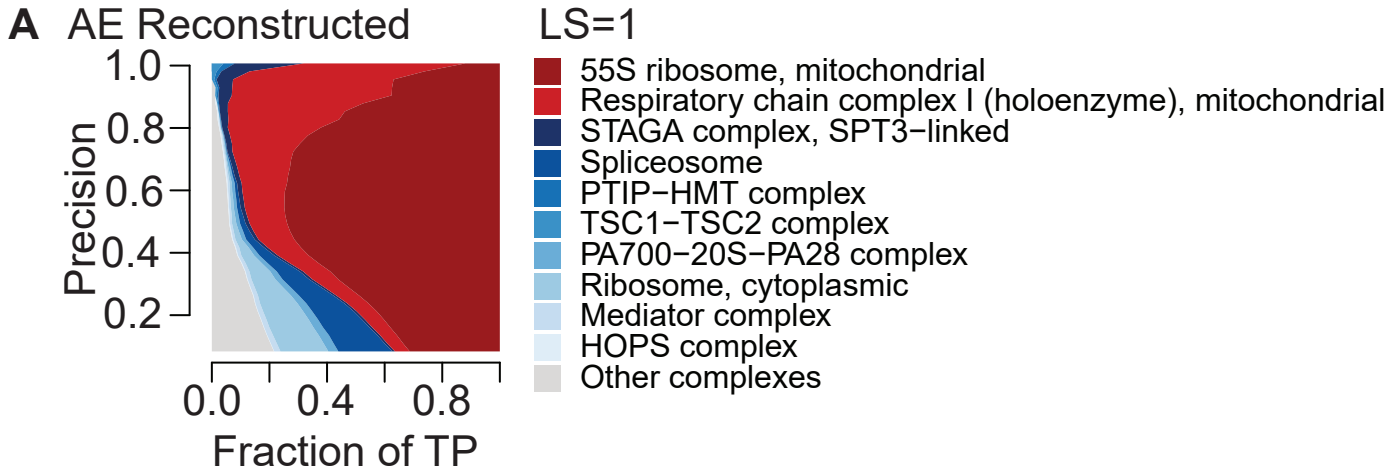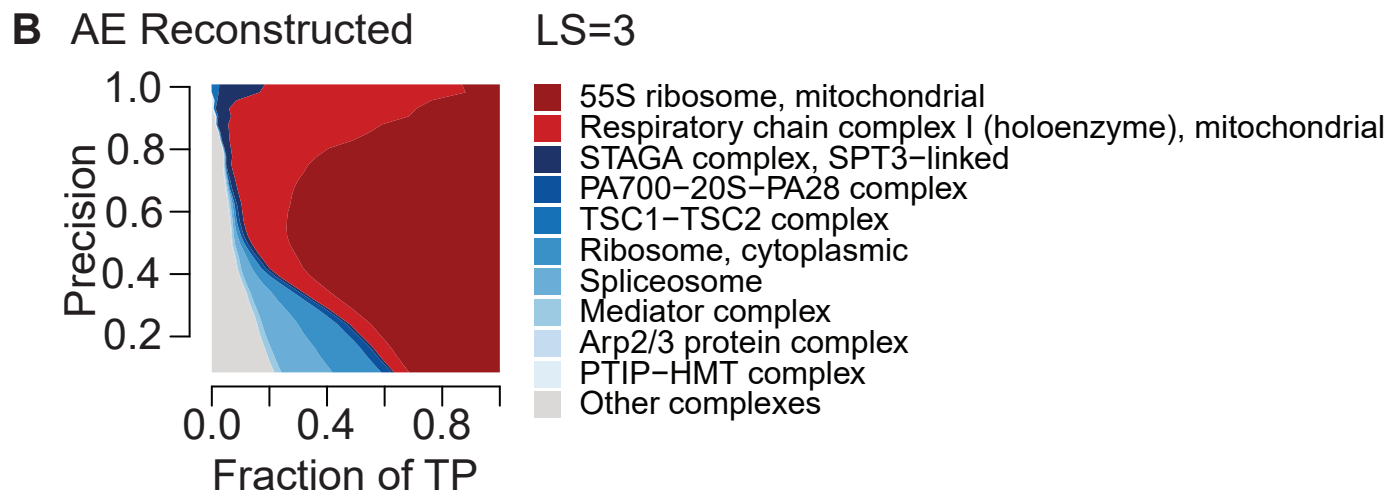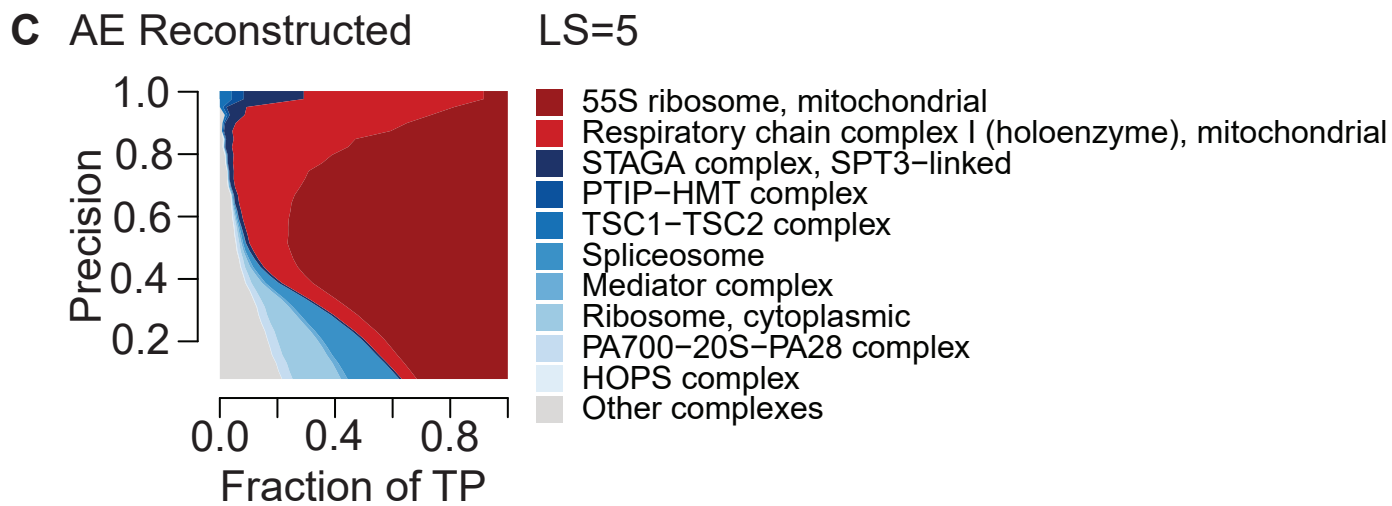

**Appendix Figure S3:** Contribution diversity plots depicting true-positive (TP) pairs contributions from CORUM complex in AE-reconstructed DepMap 20Q2 data generated with latent space sizes 1, 3 and 5 (Data ref: Broad DepMap, 2020). The top ten contributing complexes are listed in the legend, with the light gray category representing all complexes represented at lower frequency. Note that figure panel A, B, and C are replicated from Figure 2A (right panel).

**A,** Contribution diversity plot from AE-reconstructed DepMap data generated with latent space size 1.

**B,** Contribution diversity plot from AE-reconstructed DepMap data generated with latent space size 3.

**C,** Contribution diversity plot from AE-reconstructed DepMap data generated with latent space size 5.



**A AE Normalized****LS=1**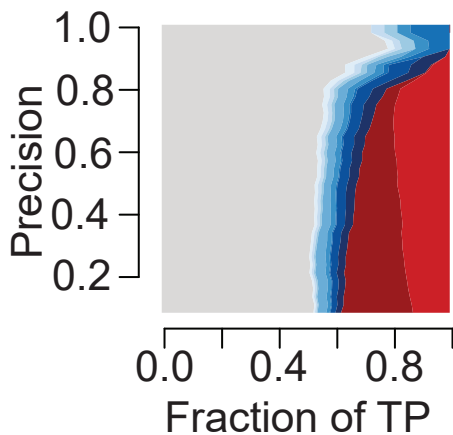

- Respiratory chain complex I (holoenzyme), mito.
- 55S ribosome, mitochondrial
- STAGA complex, SPT3 linked
- Fanconi anemia FAAP100
- Condensin II
- CCC-Wash (WASH1,FAM21C)
- Mediator complex
- Prefoldin complex
- v-ATPase-Regulator-AXIN/LKB1-AMPK
- Arp2/3 protein
- Other complexes

**B AE Normalized****LS=3**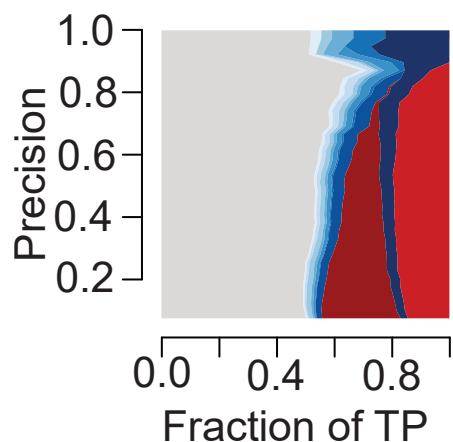

- Respiratory chain complex I (holoenzyme), mito.
- STAGA complex, SPT3 linked
- 55S ribosome, mitochondrial
- Fanconi anemia FAAP100
- Condensin II
- HOPS complex
- CENP-A NAC-CAD
- CCC-Wash (WASH1,FAM21C)
- RAD51B-RAD51C-RAD51D-XRCC2-XRCC3 complex
- Prefoldin complex
- Other complexes

**C AE Normalized****LS=5**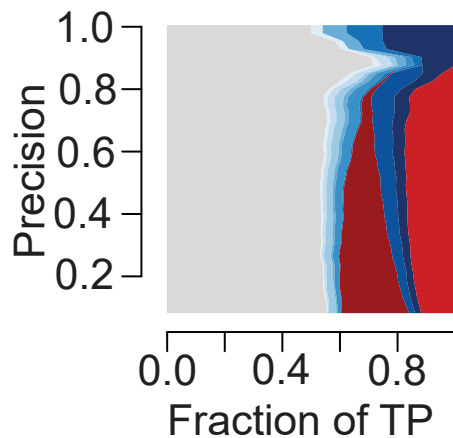

- Respiratory chain complex I (holoenzyme), mitochondrial
- STAGA complex, SPT3-linked
- Fanconi anemia FAAP100
- 55S ribosome, mitochondrial
- Condensin II
- COG complex
- GATOR complex
- Mediator complex
- Arp2/3 protein
- Prefoldin complex
- Other complexes

**Appendix Figure S4:** Contribution diversity plots depicting true-positive (TP) pairs contributions from CORUM complex in AE-normalized DepMap 20Q2 data (Data ref: Broad DepMap, 2020). The top ten contributing complexes are listed in the legend, with the light gray category representing all complexes represented at lower frequency. Note that figure panel A, B, and C are replicated from Figure 2A (right panel).

**A,** Contribution diversity plot from AE-normalized DepMap data generated with latent space size 1.

**B,** Contribution diversity plot from AE-normalized DepMap data generated with latent space size 3.

**C,** Contribution diversity plot from AE-normalized DepMap data generated with latent space size 5.

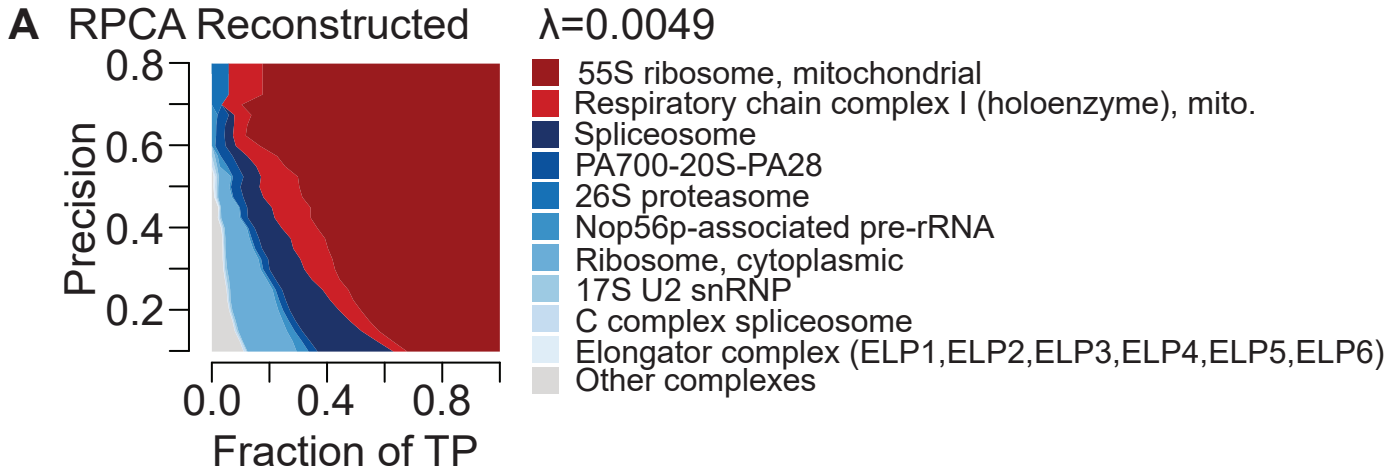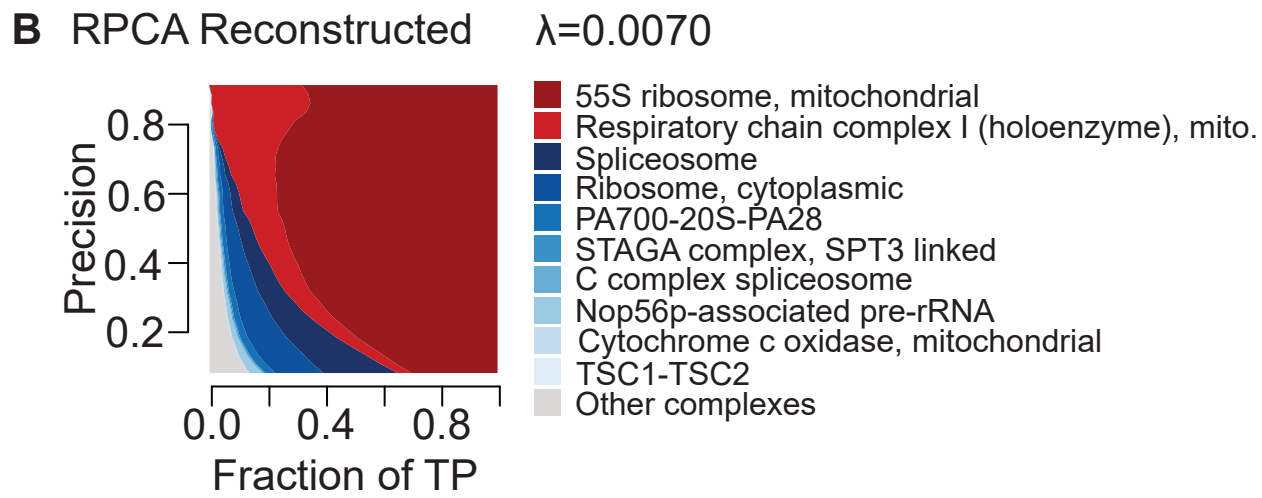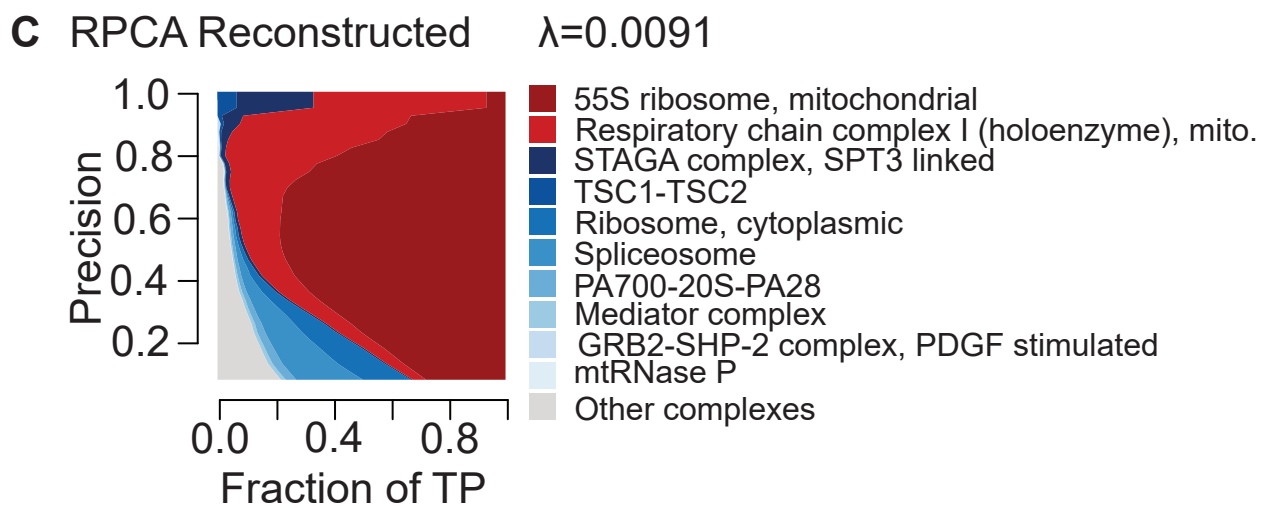

**Appendix Figure S5:** Contribution diversity plots illustrating true-positive (TP) pairs contributions from CORUM complexes in RPCA-reconstructed DepMap 20Q2 data (Data ref: Broad DepMap, 2020). The top ten contributing complexes are listed in the legend, with the light gray category representing all complexes represented at lower frequency. Note that figure panel A, B, and C are replicated from Figure 2B (right panel).

**A,** Contribution diversity plot from RPCA-reconstructed DepMap data generated with hyperparameter  $\lambda$  set to 0.0049.

**B,** Contribution diversity plot from RPCA-reconstructed DepMap data generated with hyperparameter  $\lambda$  set to 0.007.

**C,** Contribution diversity plot from RPCA-reconstructed DepMap data generated with hyperparameter  $\lambda$  set to 0.0091.

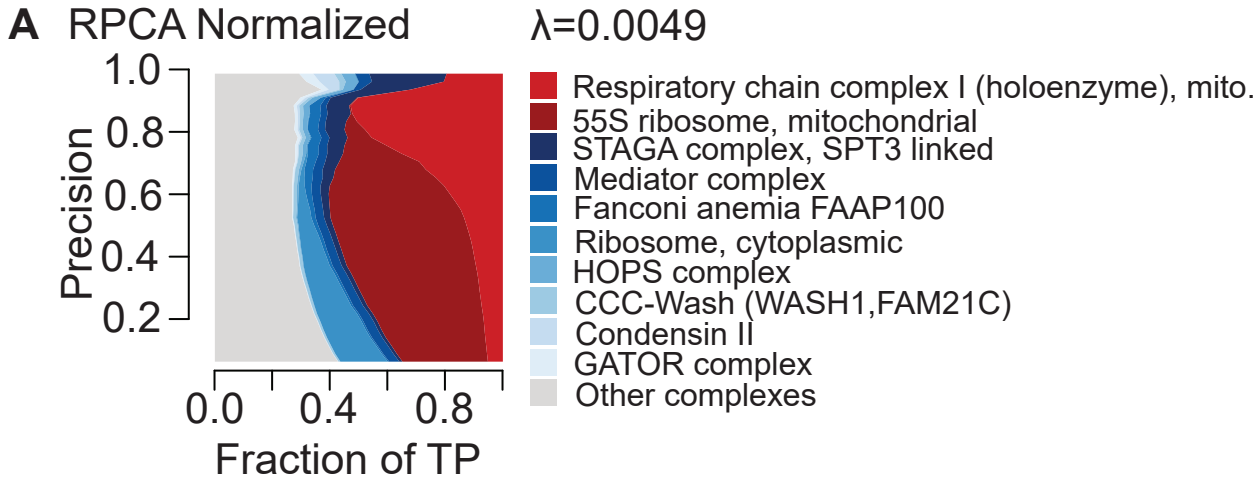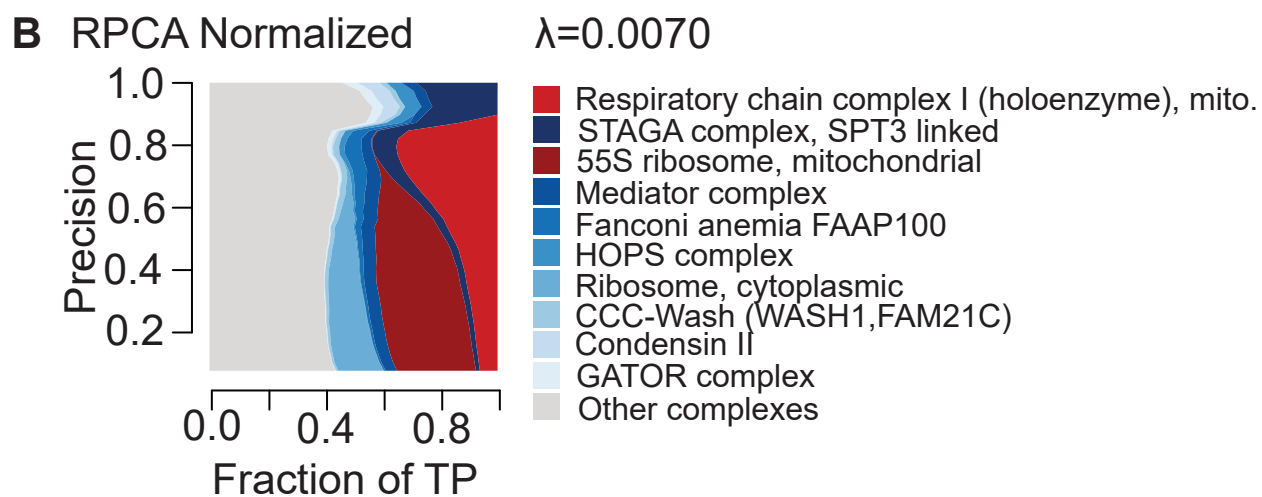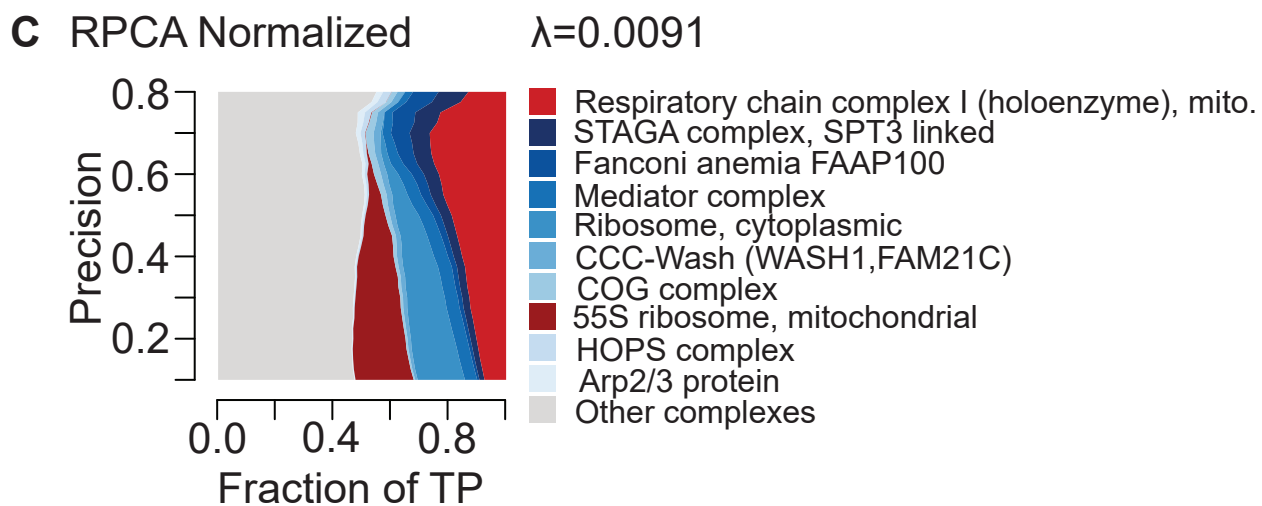

**Appendix Figure S6:** Contribution diversity plots illustrating true-positive (TP) pairs contributions from CORUM complexes in RPCA-normalized DepMap 20Q2 (Data ref: Broad DepMap, 2020). The top ten contributing complexes are listed in the legend, with the light gray category representing all complexes represented at lower frequency. Note that figure panel A, B, and C are replicated from Figure 2B (right panel).

**A,** Contribution diversity plot from RPCA-normalized DepMap data generated with hyperparameter  $\lambda$  set to 0.0049.

**B,** Contribution diversity plot from RPCA-normalized DepMap data generated with hyperparameter  $\lambda$  set to 0.007.

**C,** Contribution diversity plot from RPCA-normalized DepMap data generated with hyperparameter  $\lambda$  set to 0.0091.

**A AEO**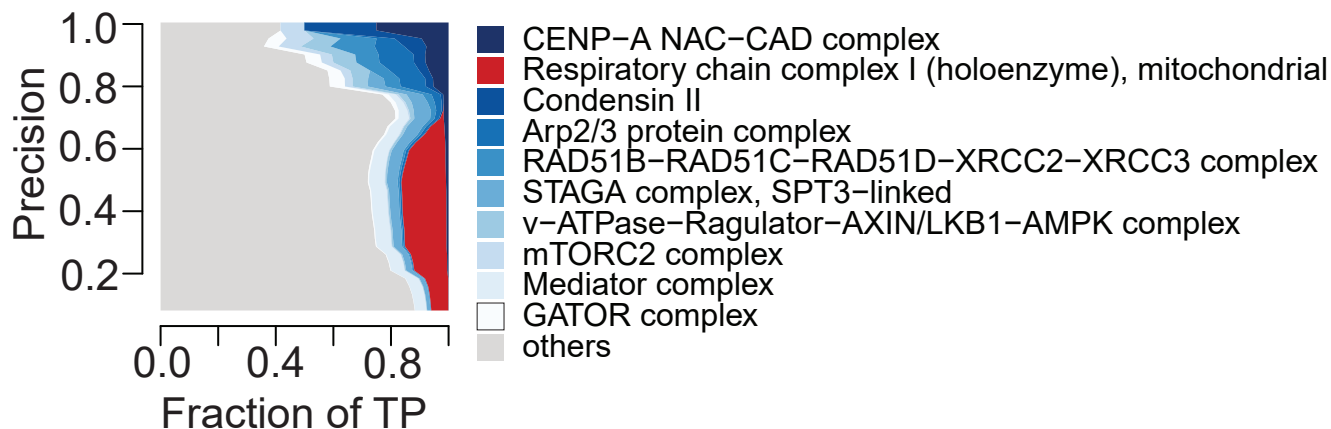**B PCO**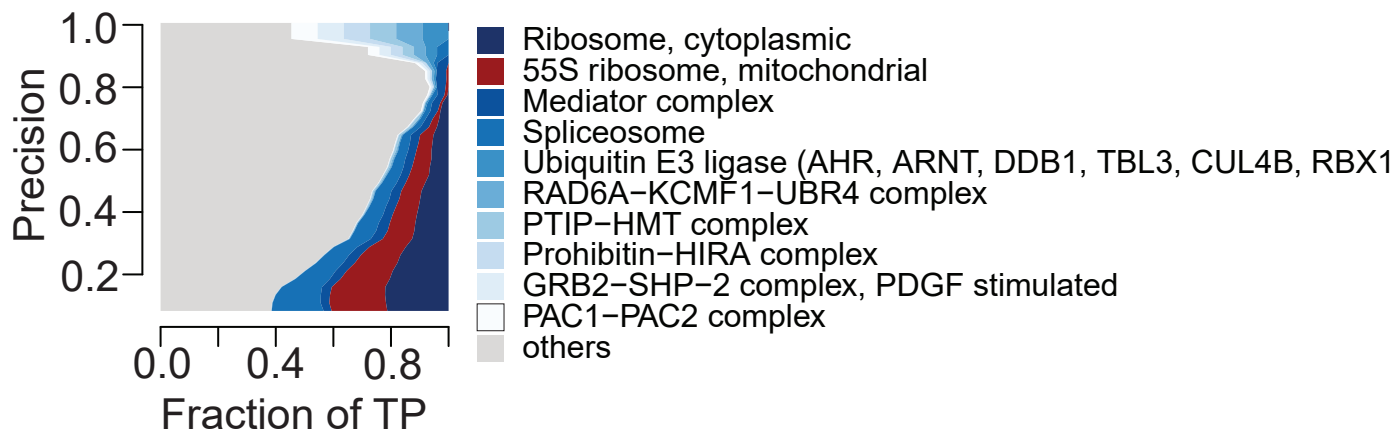**C RPCO**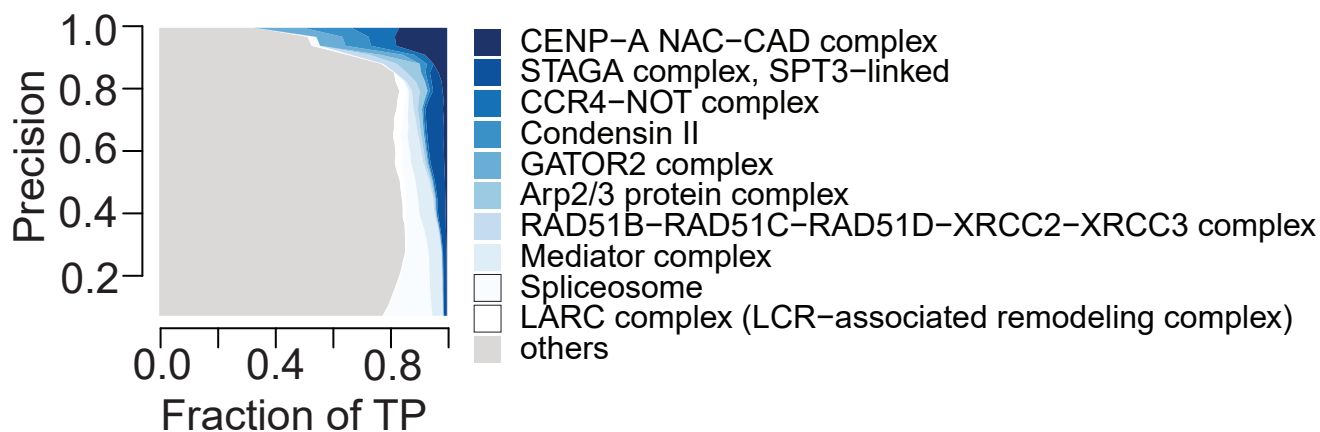

**Appendix Figure S7:** Contribution diversity plots depicting true-positive (TP) pairs contributions from CORUM complexes in onion normalized DepMap 20Q2 data (Data ref: Broad DepMap, 2020). The top ten contributing complexes are listed in the legend, with the light gray category representing all complexes represented at lower frequency. Note that figure panel A and B are replicated from Figure 3C. Figure panel C is replicated from Figure 3C and 4B.

**A,** Contribution diversity plot from onion normalized DepMap data generated with SNF (Wang *et al*, 2014) integrated AE-normalized layers (AEO).

**B,** Contribution diversity plot from onion normalized DepMap data generated with SNF integrated PCA-normalized layers (PCO).

**C,** Contribution diversity plot from onion normalized DepMap data generated with SNF integrated RPCA-normalized layers (RPCO).



## A GLS

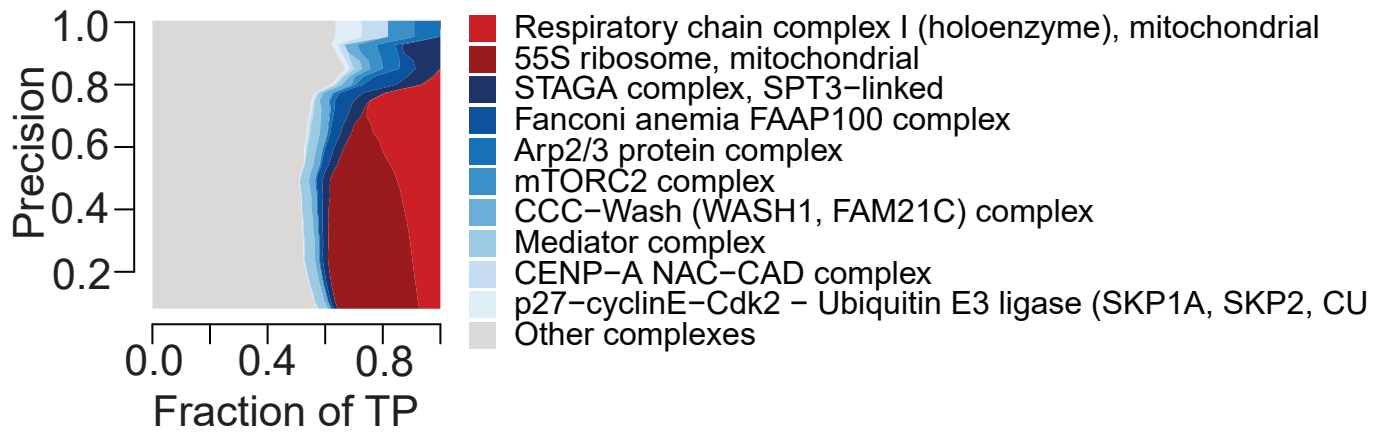

## B OLF

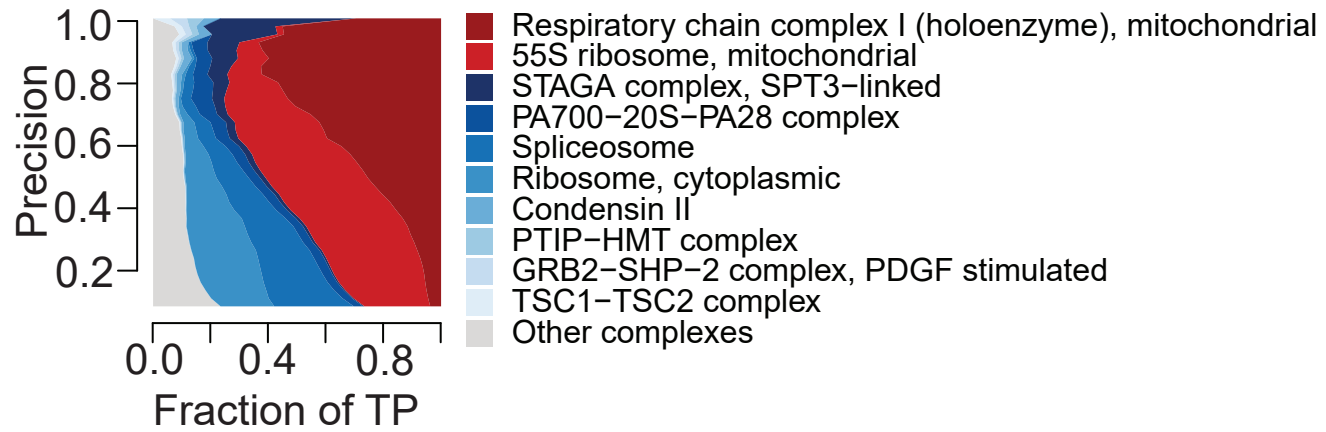

**Appendix Figure S8:** Contribution diversity plots depicting TP pairs contributions from CORUM complexes in generalized least squares (GLS) normalized (Wainberg *et al*, 2021), and olfactory receptor (OLF) normalized (Boyle *et al*, 2018) DepMap 20Q2 data (Data ref: Broad DepMap, 2020). The top ten contributing complexes are listed in the legend, with the light gray category representing all complexes represented at lower frequency. Note that figure panel A and B are replicated from Figure 4B.

**A,** Contribution diversity plot from GLS normalized DepMap data.

**B,** Contribution diversity plot from OLF normalized DepMap data.

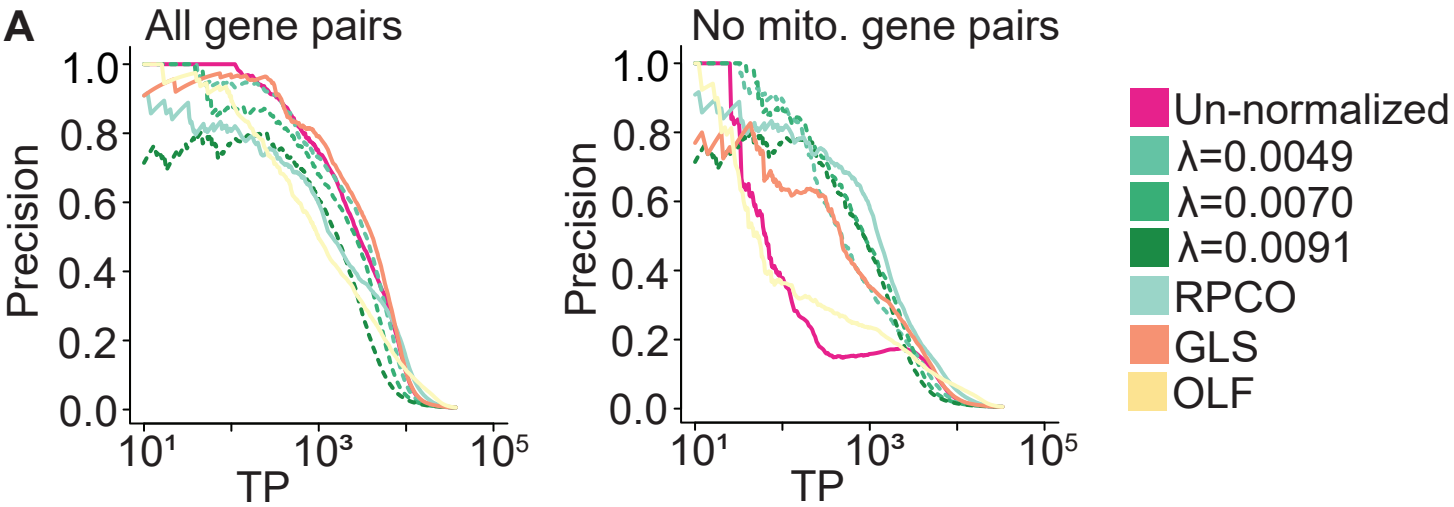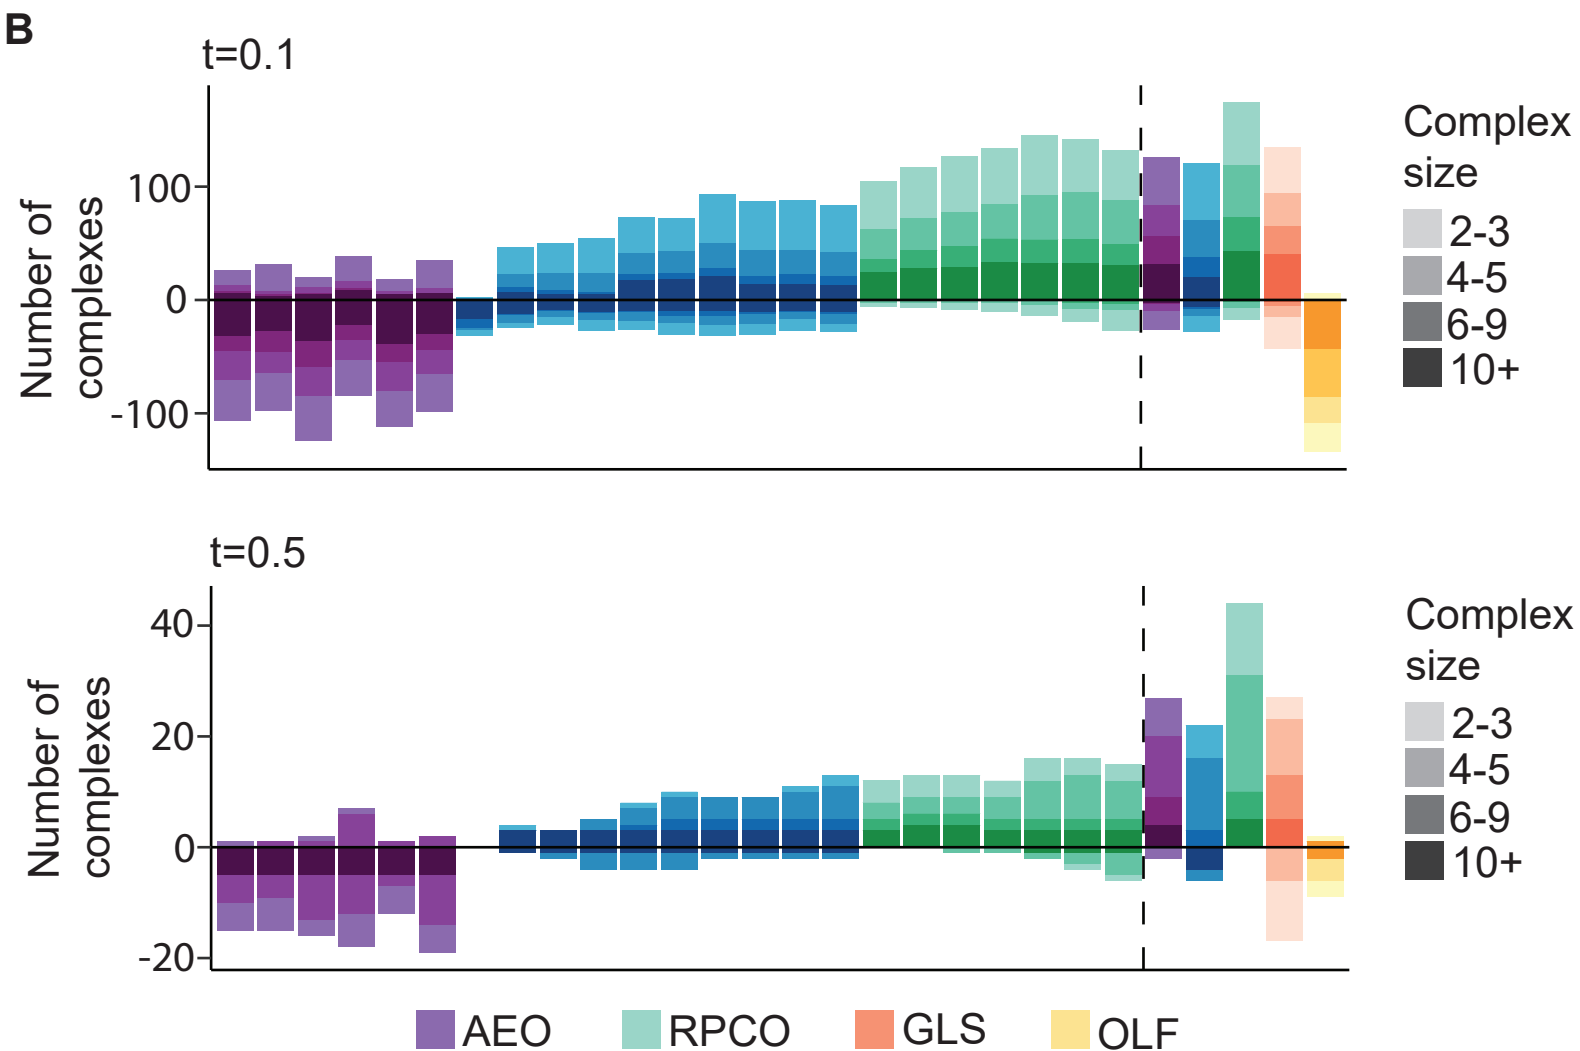

**Appendix Figure S9:** The performance comparison of individual normalized layer networks with the networks from Onion-normalization and other methods applied to DepMap 20Q2 (Data ref: Broad DepMap, 2020).

**A,** FLEX precision-recall (PR) performance analysis of networks from original DepMap, robust PCA (RPCA) normalization with hyperparameter  $\lambda$  set to 0.0049, 0.007 and 0.0091, onion normalization with robust PCA (RPCO), generalized least squares (GLS) normalization (Wainberg *et al*, 2021), and olfactory receptor (OLF) normalization (Boyle *et al*, 2018) with CORUM protein complexes as the standard. (Left) All CORUM complex gene pairs as true-positive. (Right) Mitochondrial gene pairs are removed from the evaluation. The x-axis of both plots depicts the absolute number of true positives (TPs) recovered in log scale.

**B,** Number of complexes for which area under the PR curve (AUPRC) values increase and decrease with respect to chosen AUPRC thresholds due to normalization as compared to un-normalized data. The bars on the left side of the dotted line correspond to AE-normalized layers (latent space size = 1, 2, 3, 4, 5, 10), PCA-normalized layers (first 1, 3, 5, 7, 9, 11, 13, 15, 17, 19 principal components removed) and RPCA layers ( $\lambda \sim 0.0049, 0.0056, 0.0063, 0.007, 0.0077, 0.0084, 0.0091$ ). The bars on the right side of the dotted line correspond to Onion-normalized data from the PCA, PRCA, and AE layers as well as GLS and OLF. The color gradient for each method represents four bins with complexes containing 2 to 3 genes, 4 to 5 genes, 6 to 9 genes, and 10 or more genes. (Top) AUPRC threshold,  $t = 0.1$ . (Bottom)  $t = 0.5$ .

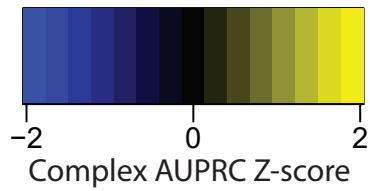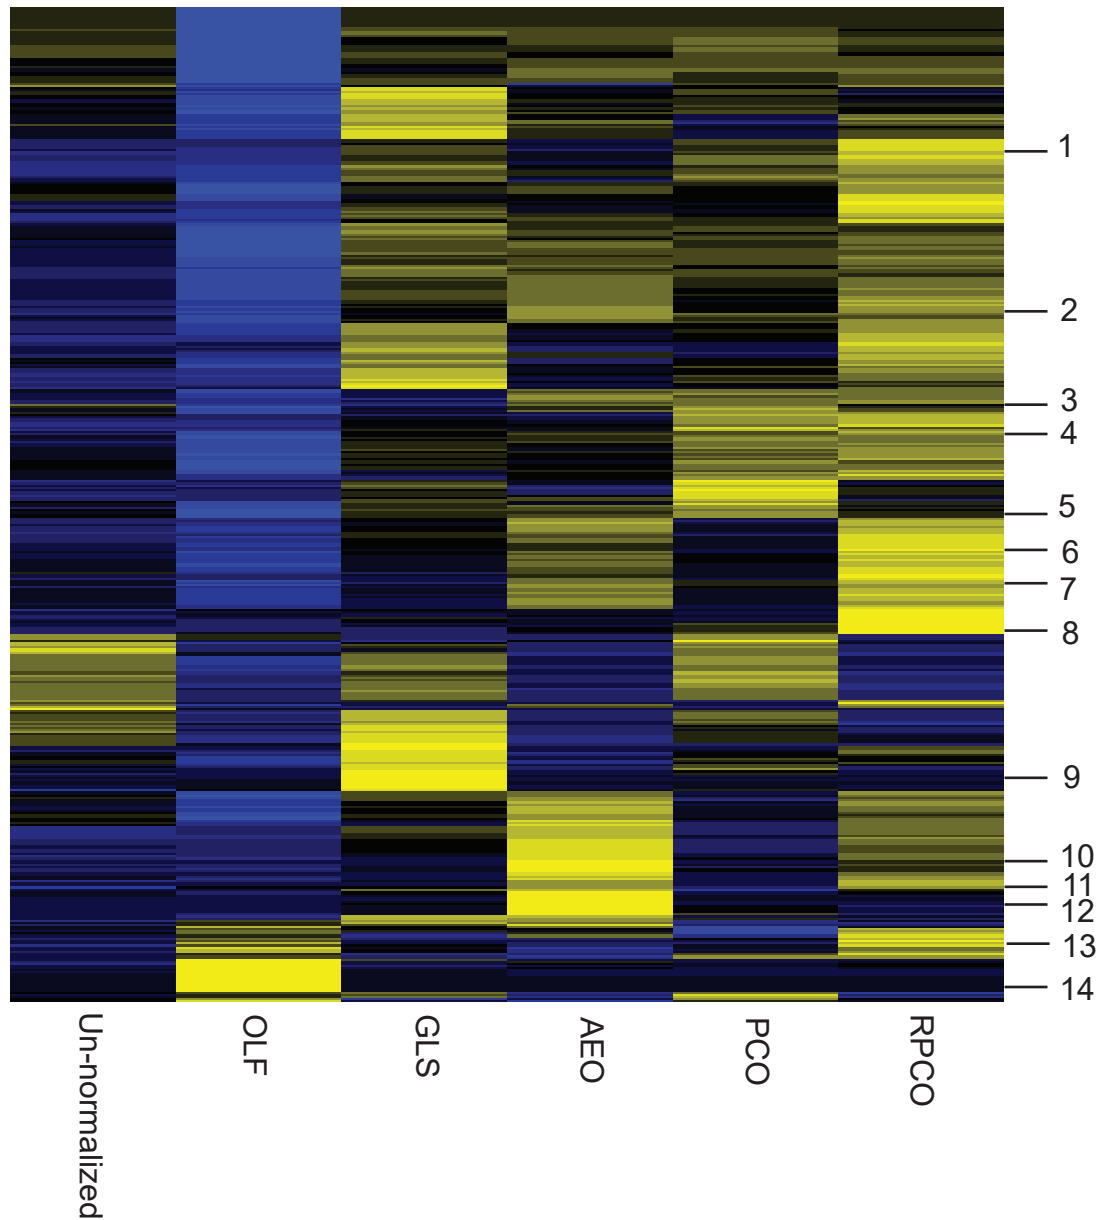

- |                             |                                         |
|-----------------------------|-----------------------------------------|
| 1. KRIT1-CCM2-ICAP1 complex | 8. TBCD-ARL2-tubulin(beta)-TBCE complex |
| 2. EBAFb complex            | 9. NoRC complex                         |
| 3. CDK8 subcomplex          | 10. AP1B1-AP1G2-AP1M-1AP1S1 complex     |
| 4. GINS complex             | 11. NELF complex                        |
| 5. FA complex               | 12. ITGAV-ITGB3-SLC3A2 complex          |
| 6. SAP complex              | 13. ANCO1-HDAC3 complex                 |
| 7. BRCA1 C complex          | 14. CCND3-CDK6 complex                  |

**Appendix Figure S10:** CORUM complex z-scores of AUPRC values for onion normalization. Z-scores across rows for un-normalized DepMap 20Q2 data (Data ref: Broad DepMap, 2020) compared to data from generalized least squares (GLS) normalization from Wainberg et al. (Wainberg *et al*, 2021), olfactory receptor (OLF) normalization from Boyle et al. (Boyle *et al*, 2018), onion normalization with AE (AEO), onion normalization with PCA (PCO), and onion normalization with robust PCA (RPCO).

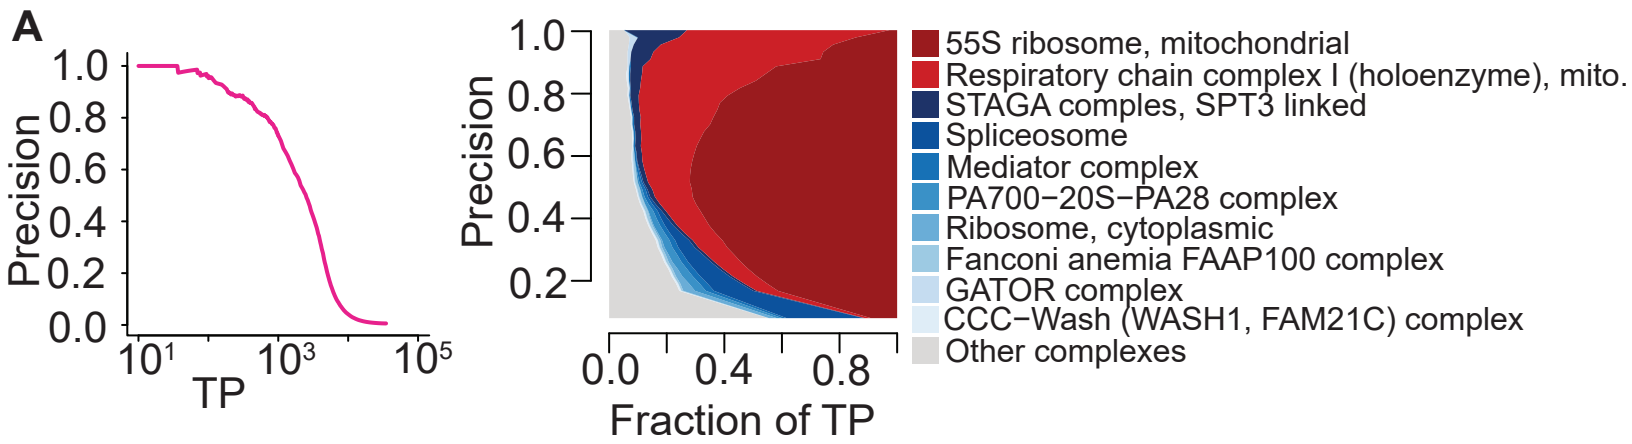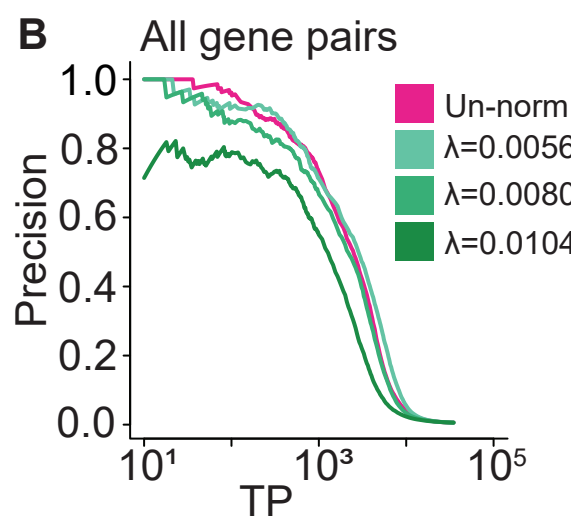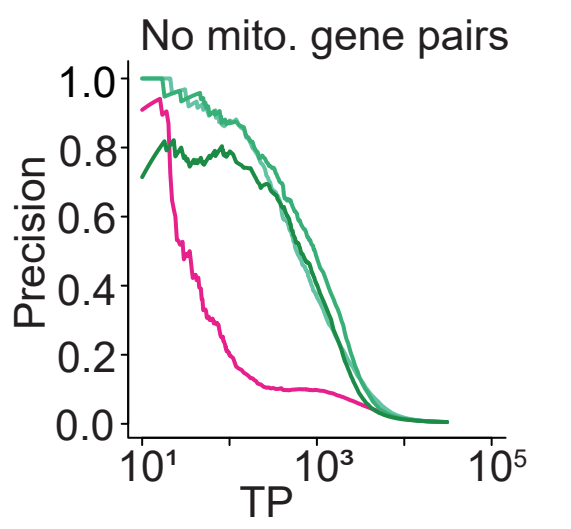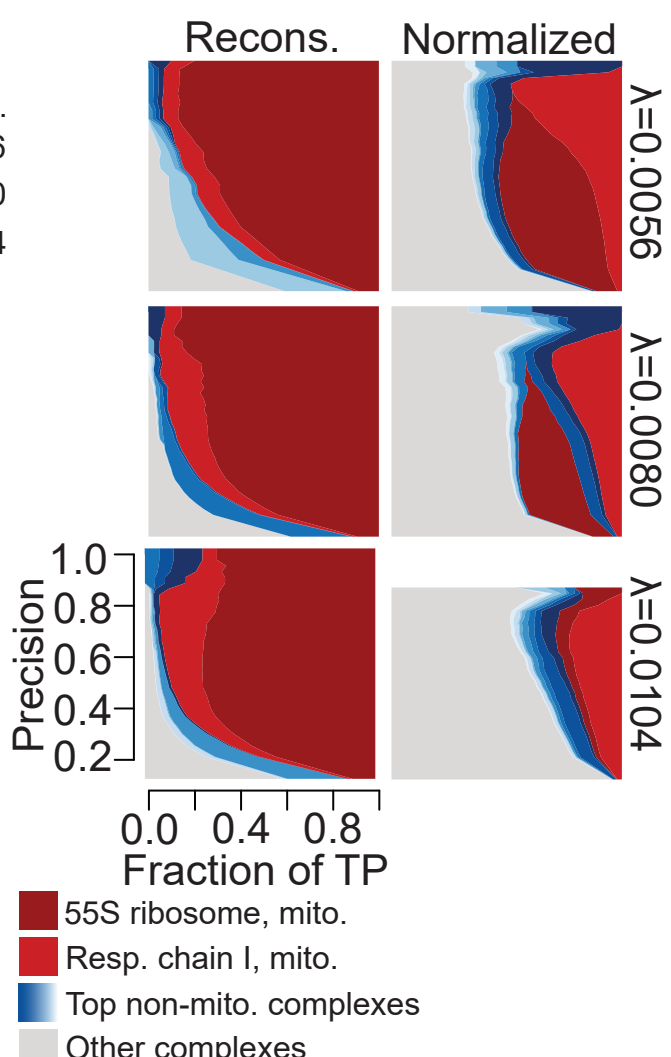

**Appendix Figure S11:** Exploration of mitochondrial bias within the DepMap 22Q4 Chronos (Data ref: Broad DepMap, 2022) and RPCA normalization across hyperparameters.

**A,** (Left) Precision- recall (PR) performance analysis of un-normalized DepMap 22Q4 Chronos gene similarity network evaluated against CORUM protein complex standard. The x-axis depicts the number of true positives (TPs) in log-scale. (Right) Contribution diversity plot of CORUM complexes in un-normalized DepMap data. This plot is constructed by sliding a precision cutoff from high to low (indicated by the y-axis), and at each point, plotting a stacked bar plot across the x-axis at that point reflecting the breakdown of complex membership of the TP pairs identified at that threshold. The top ten contributing complexes are listed in the legend, with the light gray category representing all complexes represented at lower frequency.

**B,** (Left) PR performance analysis of RPCA-normalized data generated with hyperparameter  $\lambda$  set to 0.0049, 0.007 and 0.0091 evaluated against CORUM protein complex as standard. (Right) Corresponding contribution diversity plots illustrating complex contributions in RPCA-reconstructed and RPCA-normalized data. The x-axis depicts the absolute number of true positives (TPs) recovered in log scale.



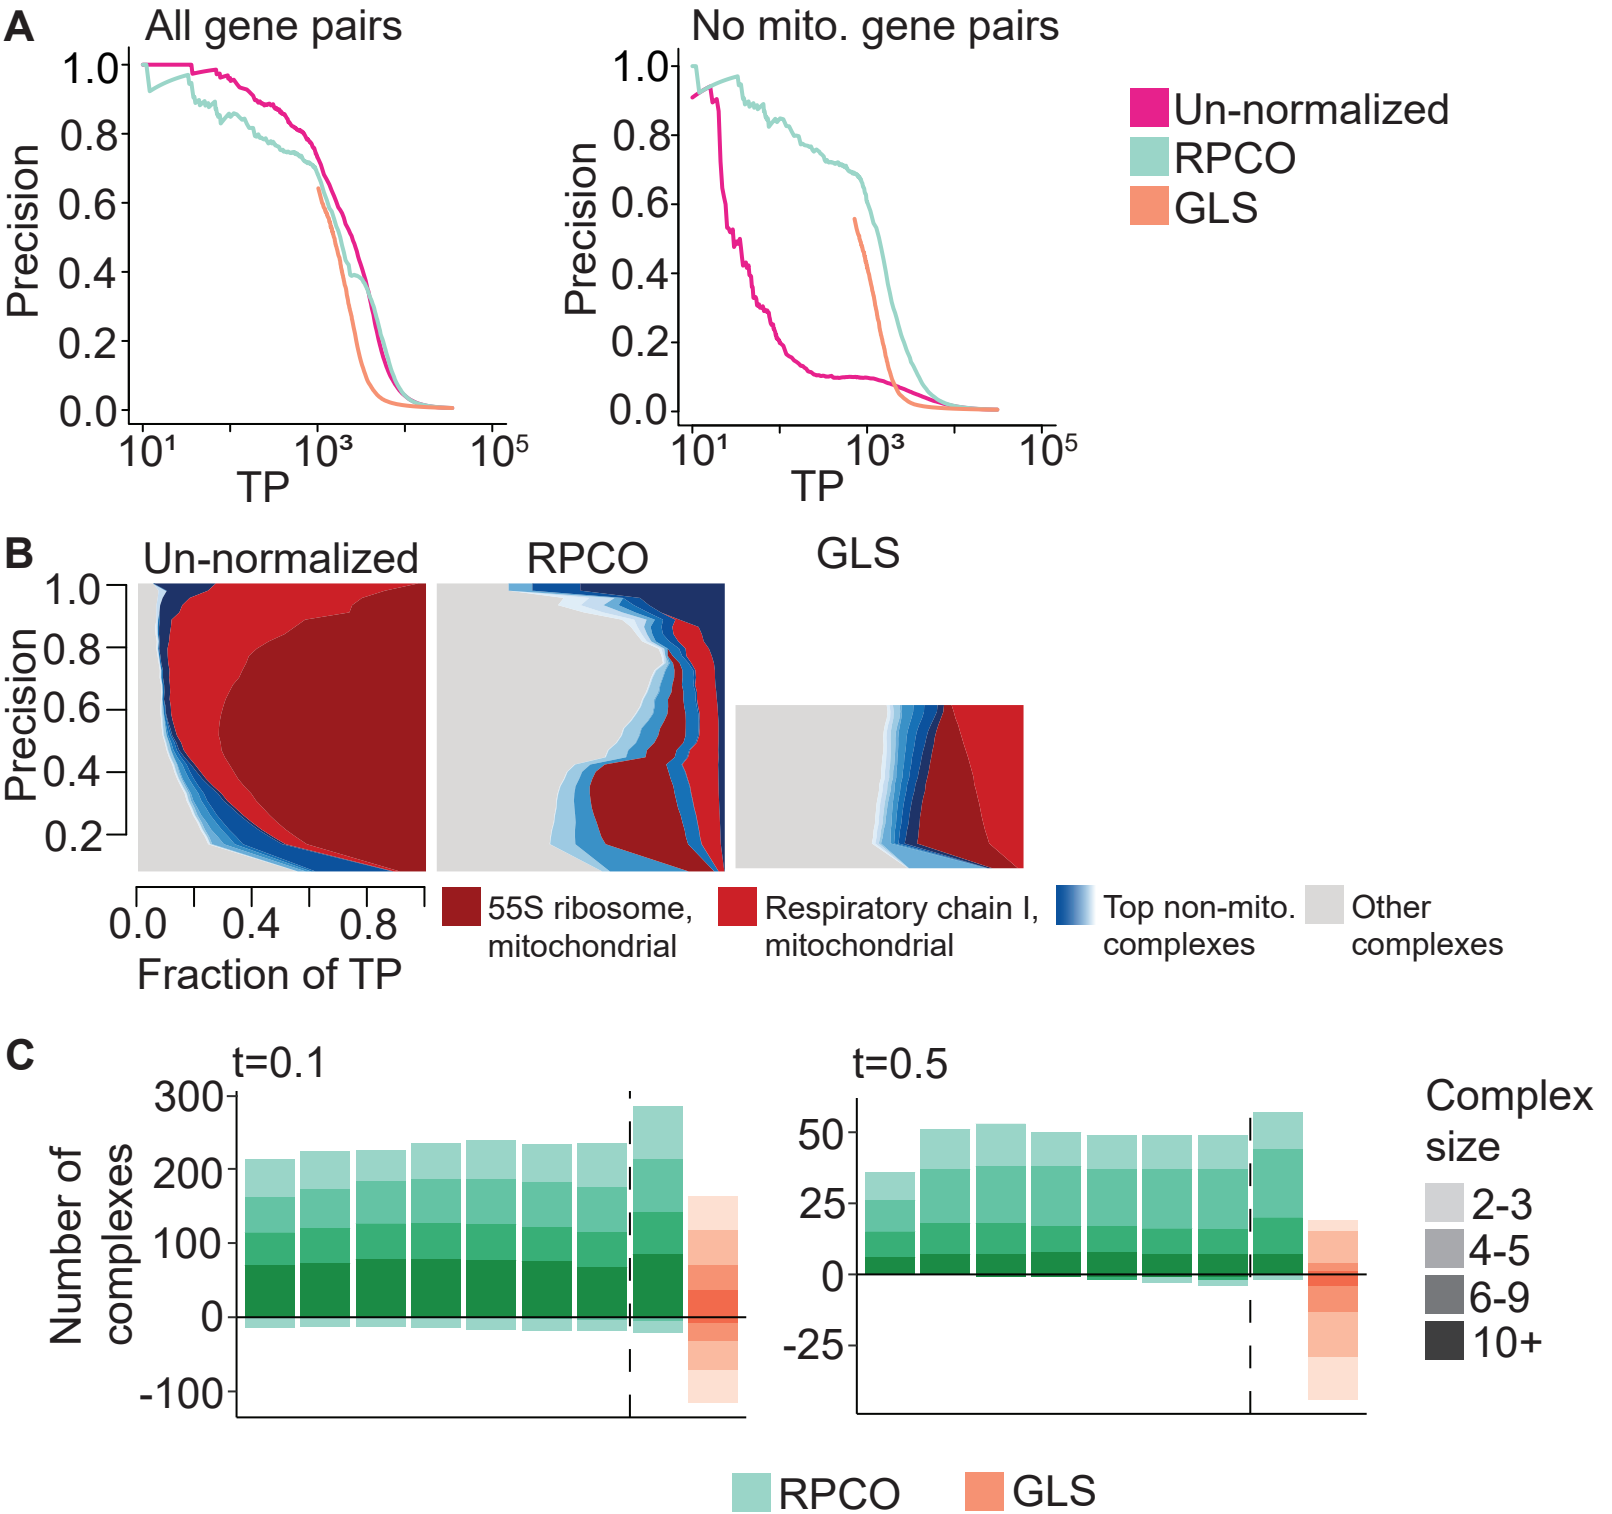

**Appendix Figure S12:** Onion-normalization applied to DepMap 22Q4 Chronos data (Data ref: Broad DepMap, 2022) with RPCA as the normalization technique.

**A,** FLEX precision-recall (PR) performance analysis of original DepMap 22Q4 Chronos data, onion normalization with robust PCA (RPCO), and generalized least squares (GLS) normalization (Wainberg *et al*, 2021) evaluated against CORUM protein complex standard. The x-axis depicts the absolute number of true positives (TPs) recovered in log scale.

**B,** Contribution diversity of CORUM complexes for the original DepMap, RPCO, and GLS. Fractions of predicted true positives (TP) from different complexes are plotted at various precision levels on the y-axis. Note that the left panel is replicated from Appendix Figure S11A (right panel).

**C,** Number of complexes for which area under the PR curve (AUPRC) values increase and decrease with respect to chosen AUPRC thresholds due to normalization as compared to un-normalized data. The bars on the left side of the dotted line correspond to RPCA-normalized layers ( $\lambda \sim 0.0056, 0.0064, 0.0072, 0.0080, 0.0088, 0.0096, 0.0104$ ). The bars on the right side of the dotted line correspond to the RPCO-normalized data from the layers as well as GLS data. The color gradient for each method represents four bins with complexes containing 2 to 3 genes, 4 to 5 genes, 6 to 9 genes, and 10 or more genes. (Left) AUPRC threshold,  $t = 0.1$ . (Right)  $t = 0.5$ .

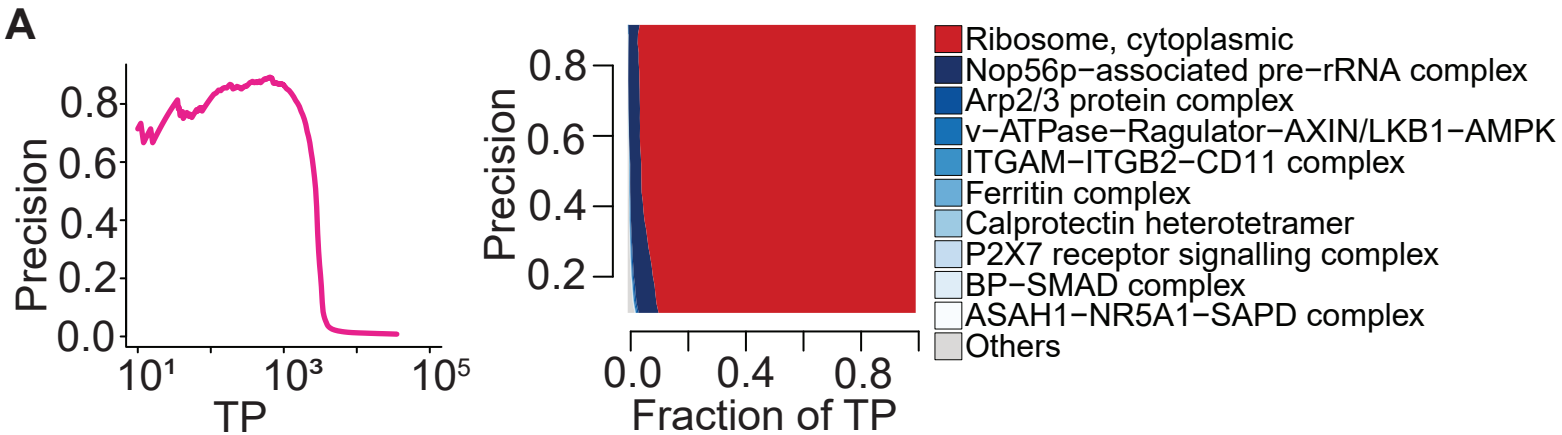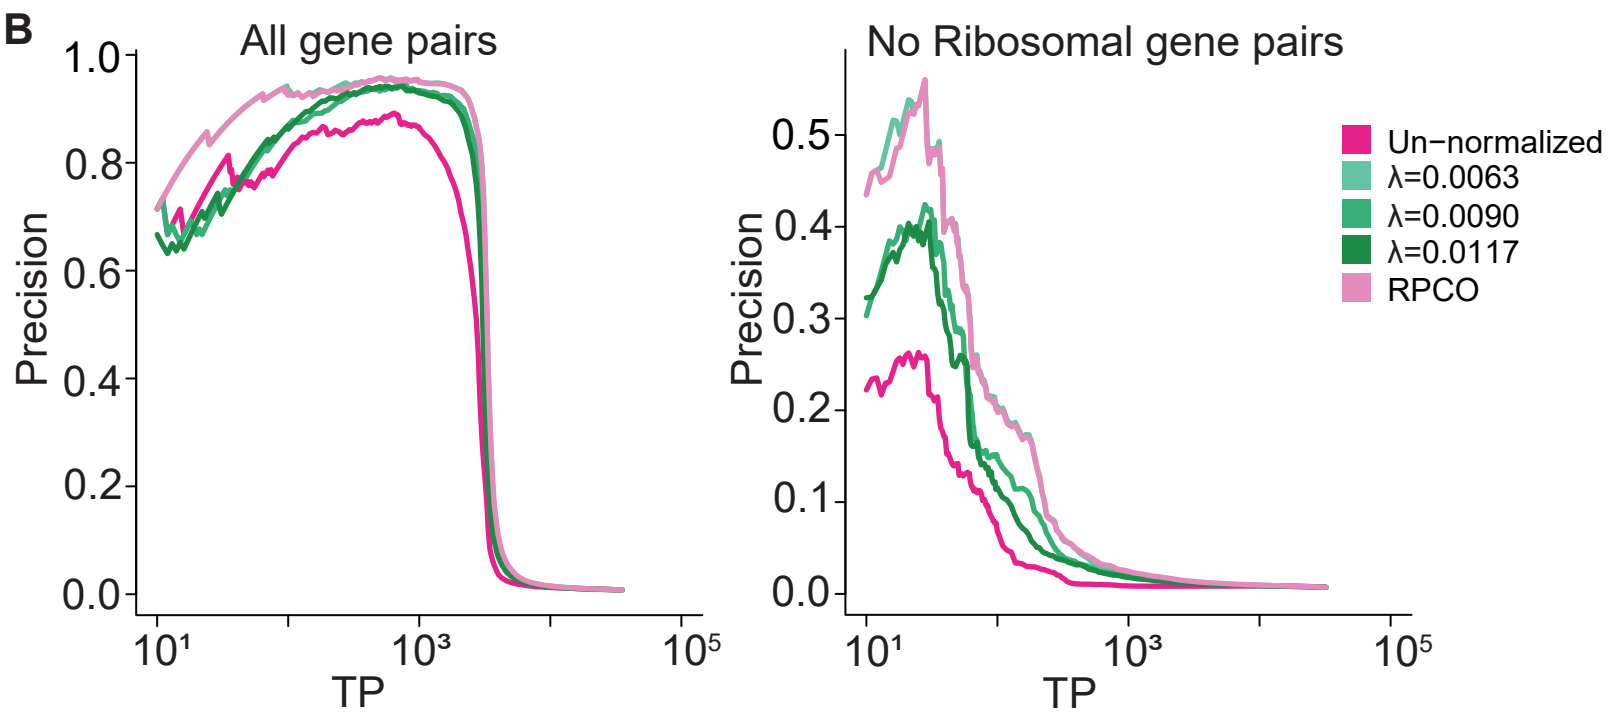

**Appendix Figure S13:** Onion-normalization applied to RNA-seq gene expression data (Data ref: 10x Genomics, 2019) with RPCA as the normalization technique and maximum-weight as integration method.

**A,** (Left) Precision-recall (PR) performance analysis of un-normalized gene expression data evaluated against CORUM protein complexes. The x-axis depicts the number of true positives (TPs) in log scale. (Right) Contribution diversity plot illustrating TP pairs contributions from CORUM complexes in un-normalized gene expression data. The x-axis is the fraction of gene pairs correctly predicted as functionally related at different precision levels in the y-axis. The legend shows the top ten contributing complexes.

**B,** (Left) PR performance analysis of RPCA-normalized data generated with  $\lambda$  set to 0.0063, 0.009, and 0.0117 as well as RPCO-normalized data evaluated against CORUM protein complexes. (Right) PR performance of RPCA-normalized data generated with  $\lambda$  set to 0.0063, 0.009, and 0.0117 as well as RPCO-normalized data evaluated against CORUM protein complexes excluding cytoplasmic ribosomal gene pairs from the evaluation process. The x-axis depicts the absolute number of true positives (TPs) recovered in log scale.

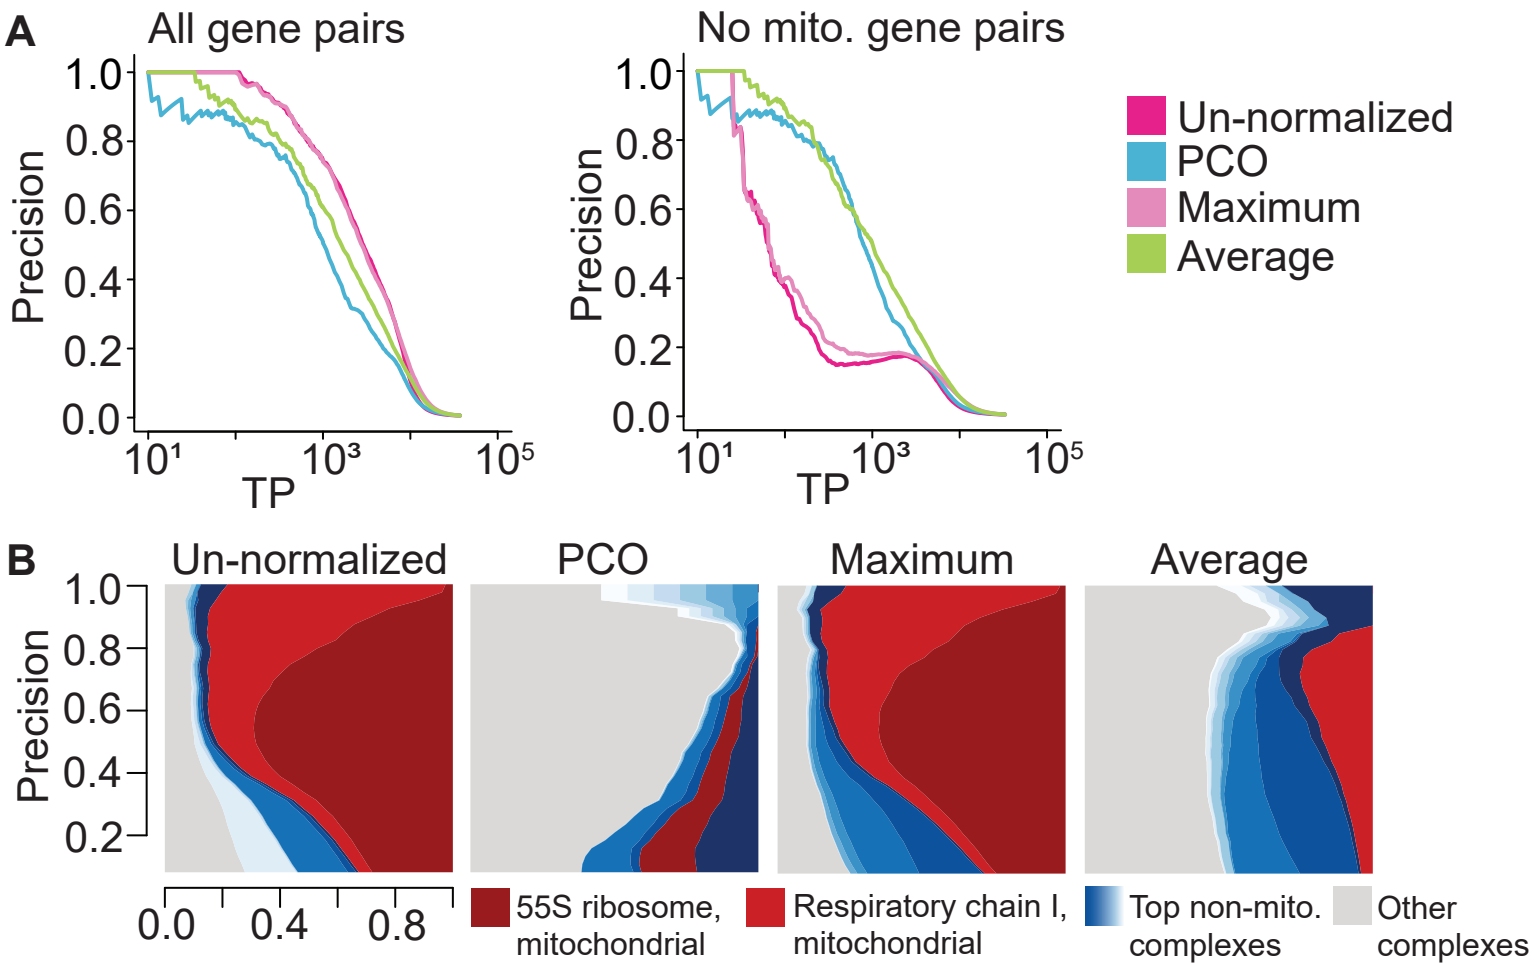

**Appendix Figure S14:** Onion-normalization with PCA as dimensionality reduction method and maximum or average similarity as integration method applied to DepMap 20Q2 (Data ref: Broad DepMap, 2020).

**A,** Comparison of Precision-recall (PR) performance of original DepMap data, SNF (Wang *et al*, 2014) integrated PCA-normalized layers (PCO), average of PCA-normalized layers and maximum across PCA-normalized layers evaluated against CORUM complex standard.

Layers are generated by removing the first  $n$  principal components where  $n = 1, 3, 5, 7, 9, 11, 13, 15, 17, 19$ . The x-axis depicts the absolute number of true positives (TPs) recovered in log scale.

**B,** Contribution diversity plots from original DepMap data, SNF integrated PCA-normalized layers (PCO), average of PCA-normalized layers and maximum across PCA-normalized layers evaluated against CORUM complex standard. The x-axis depicts the absolute number of true positives (TPs) recovered in log scale. Note that the left panel is replicated from Figure 1C (right panel) and the second panel is replicated from Figure 3C.

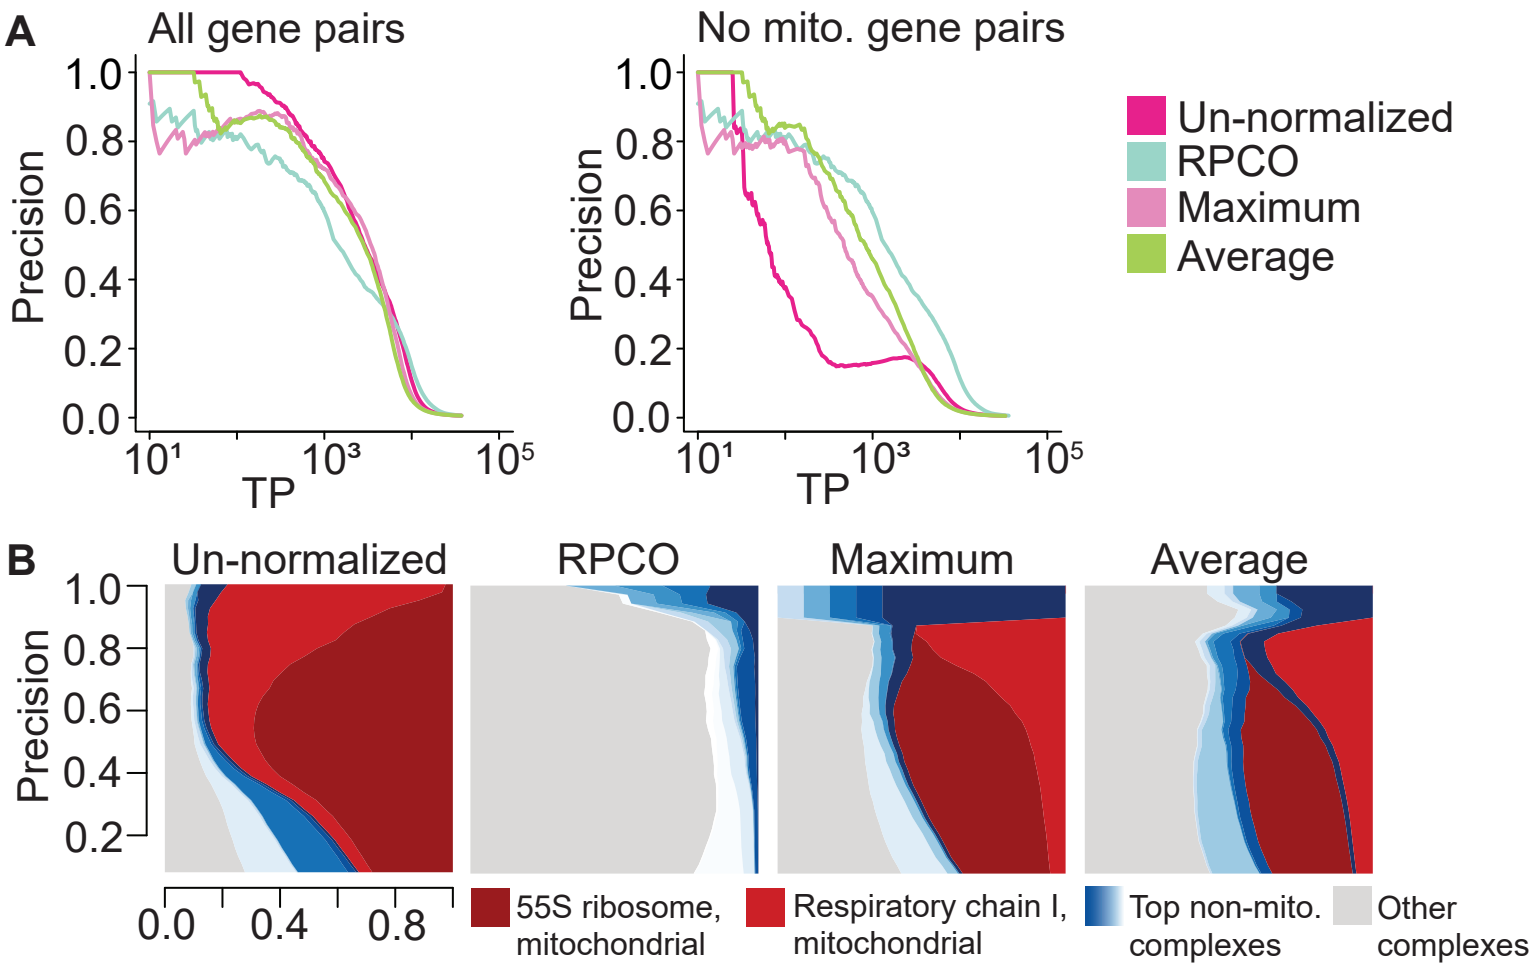

**Appendix Figure S15:** Onion-normalization with RPCA as dimensionality reduction method and maximum or average similarity as integration method applied to DepMap 20Q2 (Data ref: Broad DepMap, 2020)

**A,** Comparison of Precision-recall (PR) performance of original DepMap data, SNF (Wang *et al*, 2014) integrated RPCA-normalized layers (RPCO), average of RPCA-normalized layers and maximum across RPCA-normalized layers evaluated against CORUM complex standard. Layers are generated by setting RPCA hyperparameter  $\lambda$  to approximately 0.0049, 0.0056, 0.0063, 0.007, 0.0077, 0.0084, and 0.0091. The x-axis depicts the absolute number of true positives (TPs) recovered in log scale.

**B,** Contribution diversity plots from original DepMap data, SNF integrated RPCA-normalized layers (RPCO), average of RPCA-normalized layers and maximum across RPCA-normalized layers evaluated against CORUM complex standard. Note that the left panel is replicated from Figure 1C (right panel), 3C, 4B, and Appendix Figure S14B. The second panel is replicated from Figure 3C and 4B.



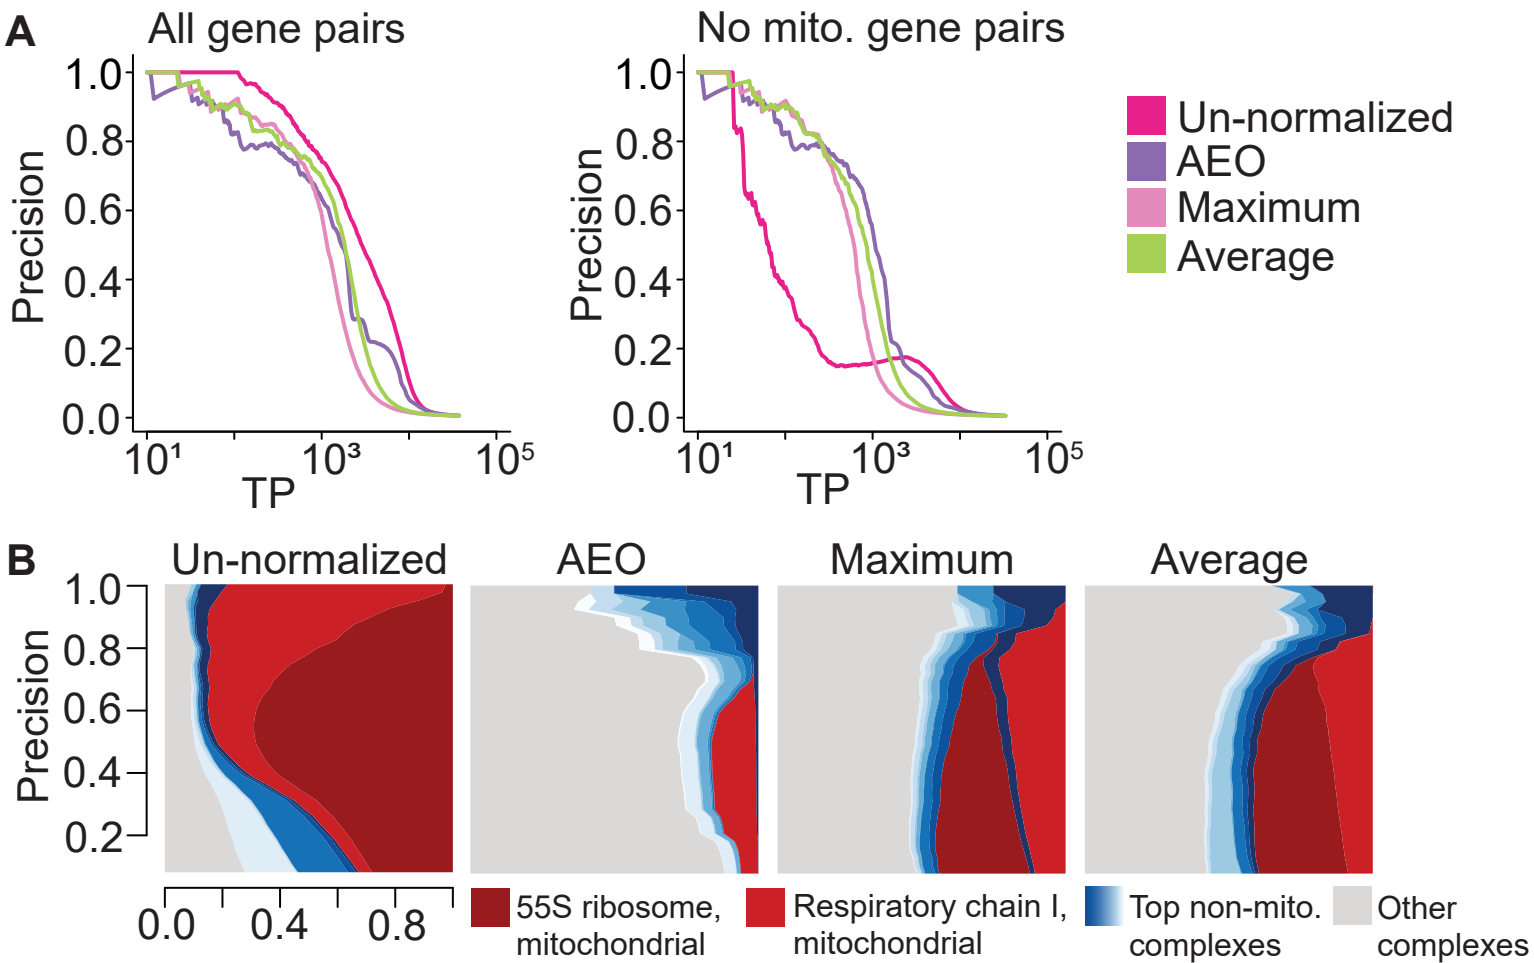

**Appendix Figure S16:** Onion-normalization with AE as dimensionality reduction method and maximum or average similarity as integration method applied to DepMap 20Q2 (Data ref: Broad DepMap, 2020).

**A,** Comparison of Precision-recall (PR) performance of original DepMap data, SNF (Wang *et al*, 2014) integrated AE-normalized layers (AEO), average of RPCA-normalized layers and maximum across RPCA-normalized layers evaluated against CORUM complex standard. Layers are generated by dialing auto-encoder latent space size to 1, 2, 3, 4, 5, and 10. The x-axis depicts the absolute number of true positives (TPs) recovered in log scale.

**B,** Contribution diversity plots from original DepMap data, SNF integrated AE-normalized layers (AEO), average of RPCA-normalized layers and maximum across RPCA-normalized layers evaluated against CORUM complex standard. Note that the left panel is replicated from Figure 1C (right panel), 3C, 4B, and Appendix Figure S14B and S15B. The second panel is replicated from Figure 3C.

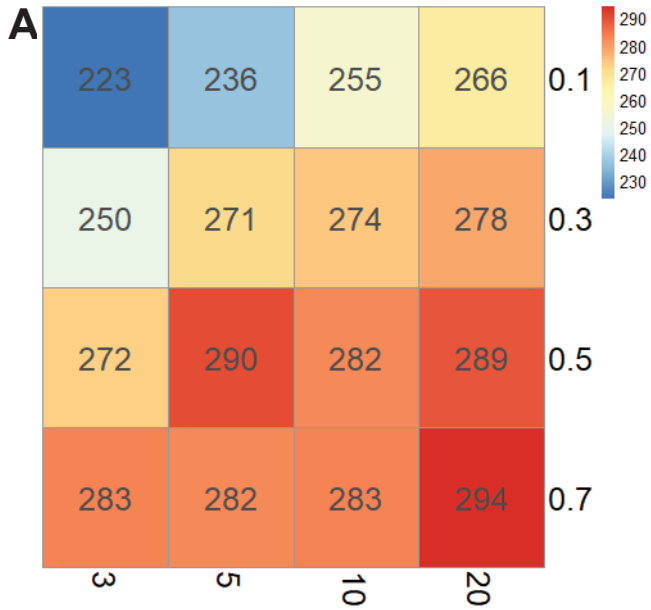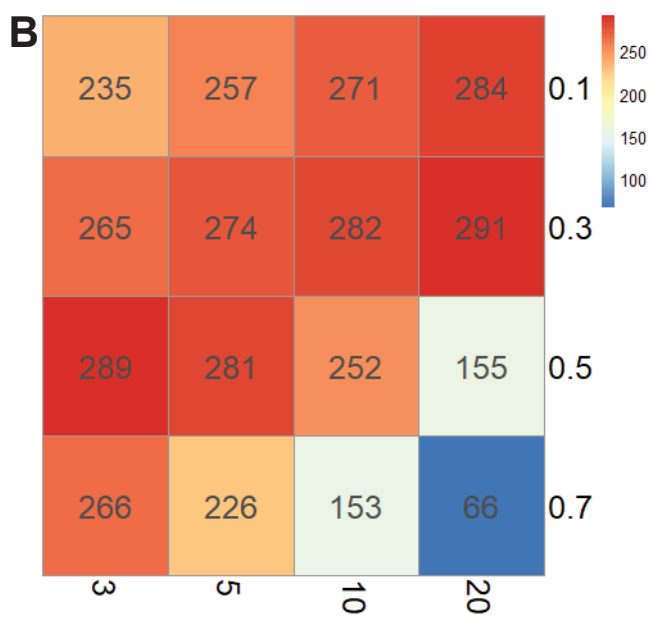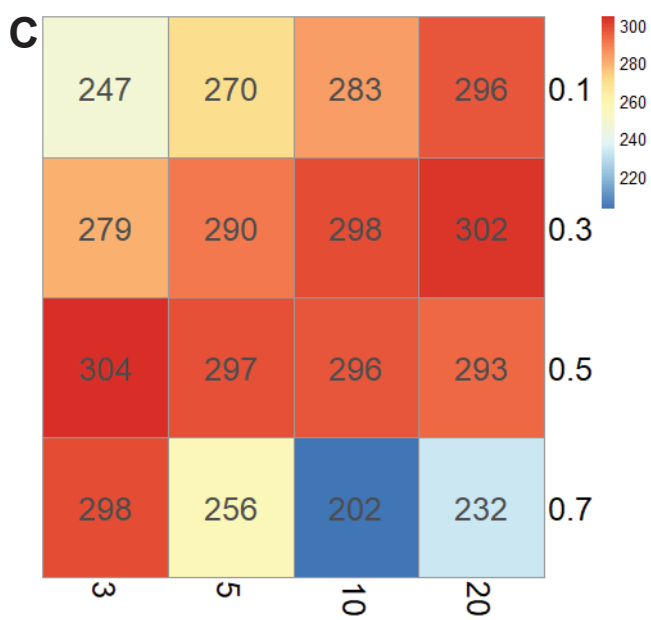

**Appendix Figure S17:** SNF hyperparameter exploration for onion normalization applied to DepMap 20Q2 (Data ref: Broad DepMap, 2020). The number of CORUM protein complexes which contribute any true positive pairs at a precision threshold of 0.5 are plotted for SNF parameters of  $\sigma = 0.1, 0.3, 0.5, 0.7$  on the y-axis and  $k = 3, 5, 10, 20$  on the x-axis.

**A,** Autoencoder-normalized data as input to onion normalization.

**B,** PCA-normalized data as input to onion normalization.

**C,** Robust PCA-normalized data as input to onion normalization.

## References

- Boyle EA, Pritchard JK & Greenleaf WJ (2018) High-resolution mapping of cancer cell networks using co-functional interactions. *Molecular Systems Biology* 14: e8594
- Broad DepMap (2020) DepMap 20Q2 Public.  
([https://figshare.com/articles/DepMap\\_20Q2\\_Public/12280541/4](https://figshare.com/articles/DepMap_20Q2_Public/12280541/4)) [DATASET]
- Broad DepMap (2022) DepMap 22Q4 Public.  
([https://figshare.com/articles/dataset/DepMap\\_22Q4\\_Public/21637199/2](https://figshare.com/articles/dataset/DepMap_22Q4_Public/21637199/2)) [DATASET]
- Wainberg M, Kamber RA, Balsubramani A, Meyers RM, Sinnott-Armstrong N, Hornburg D, Jiang L, Chan J, Jian R, Gu M, *et al* (2021) A genome-wide atlas of co-essential modules assigns function to uncharacterized genes. *Nat Genet* 53: 638–649
- Wang B, Mezlini AM, Demir F, Fiume M, Tu Z, Brudno M, Haibe-Kains B & Goldenberg A (2014) Similarity network fusion for aggregating data types on a genomic scale. *Nat Methods* 11: 333–337
- 5k Peripheral blood mononuclear cells (PBMCs) from a healthy donor (v3 chemistry), Single Cell Gene Expression Dataset by Cell Ranger 3.0.2. (2019) 10x Genomics  
([https://support.10xgenomics.com/single-cell-gene-expression/datasets/3.0.2/5k\\_pbmc\\_v3](https://support.10xgenomics.com/single-cell-gene-expression/datasets/3.0.2/5k_pbmc_v3)) [DATASET]
