# Supplementary material for: Dimensionality reduction methods for extracting functional networks from large‐scale CRISPR screens
Source: PubMed Central journal article supplement (PMC10632734; doi:10.15252/msb.202311657), 2023-09-26
Supplement: MSB-19-e11657-s004.pdf [file MSB-19-e11657-s004.pdf]

## Expanded View Figures

**Figure EV1. CORUM complex z-scores of AUPRC values for PCA normalization.**

AUPRC values per complex (rows) for the un-normalized DepMap 20Q2 data (Data ref: Broad DepMap, 2020) (far left column) are compared to PCA-normalized DepMap data with the first 1, 3, 5, 7, 9, 11, 13, 15, 17, or 19 PCs removed. AUPRC values have been z-score-normalized per row for visualization purposes.

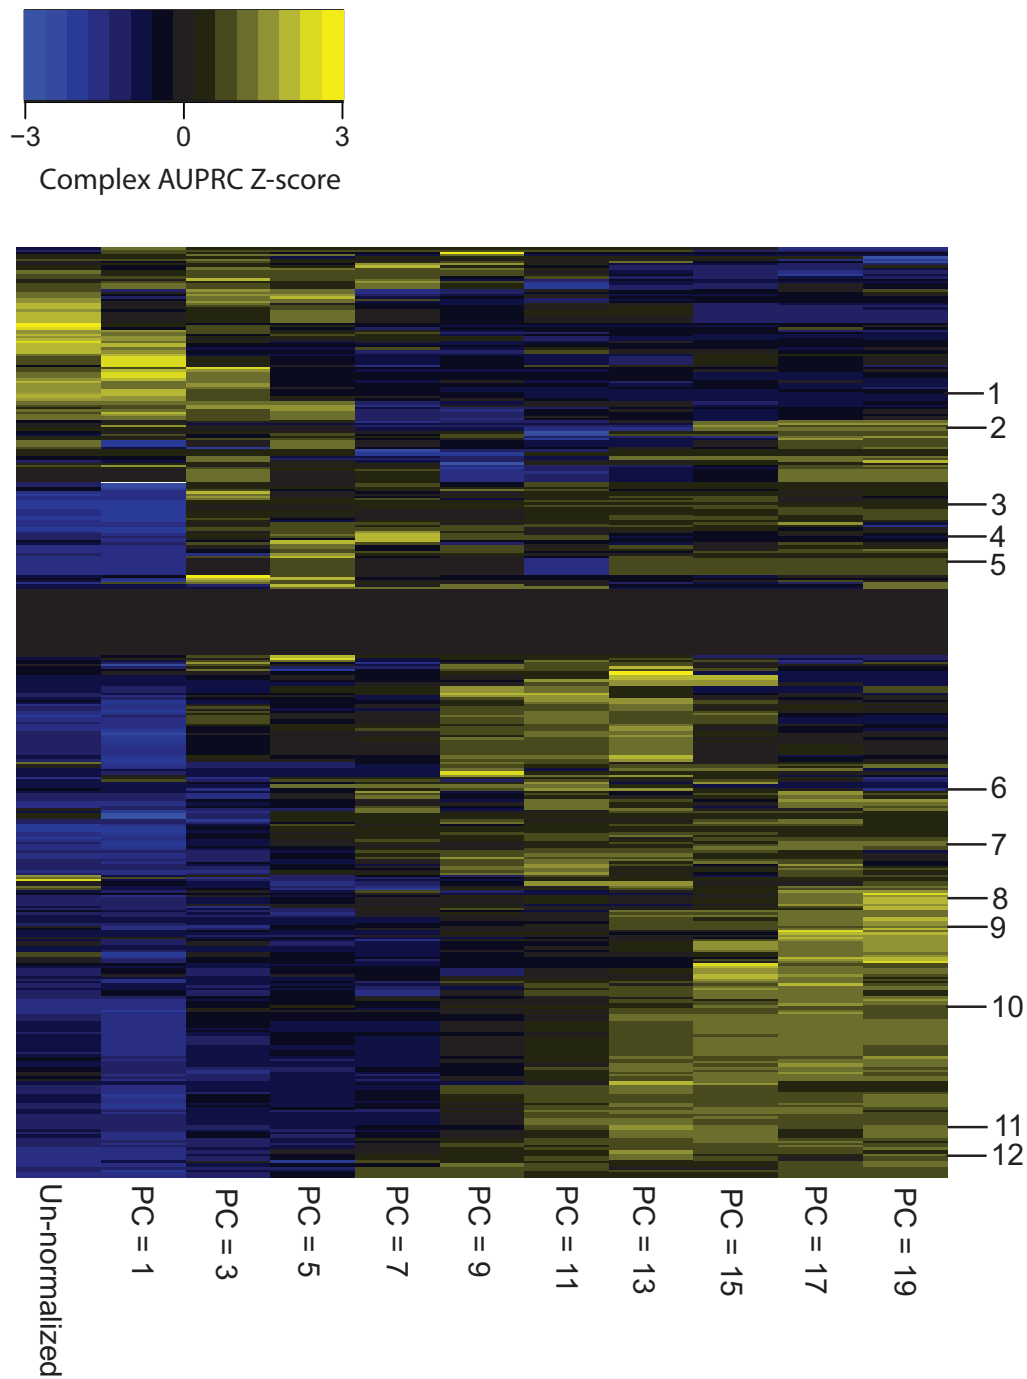

- |                                      |                         |
|--------------------------------------|-------------------------|
| 1. 55S ribosome, mitochondrial       | 7. MCM complex          |
| 2. ORC 2-4 complex                   | 8. CDK8 subcomplex      |
| 3. WDR20-USP46-UAF1 complex          | 9. BORC complex         |
| 4. MCM2-MCM6-MCM7 complex            | 10. KICSTOR complex     |
| 5. RAD50-MRE11-NBN-p200-p350 complex | 11. Condensin I complex |
| 6. mTOR complex                      | 12. MIB complex         |

Figure EV1.

**Figure EV2. CORUM complex z-scores of AUPRC values for robust PCA normalization.**

AUPRC values per complex (rows) for the un-normalized DepMap 20Q2 data (Data ref: Broad DepMap, 2020) (far left column) are compared to robust RPCA-normalized DepMap data for  $\lambda \approx 0.0049, 0.0056, 0.0063, 0.007, 0.0077, 0.0084, 0.0091$ . AUPRC values have been z-score-normalized per row for visualization purposes.

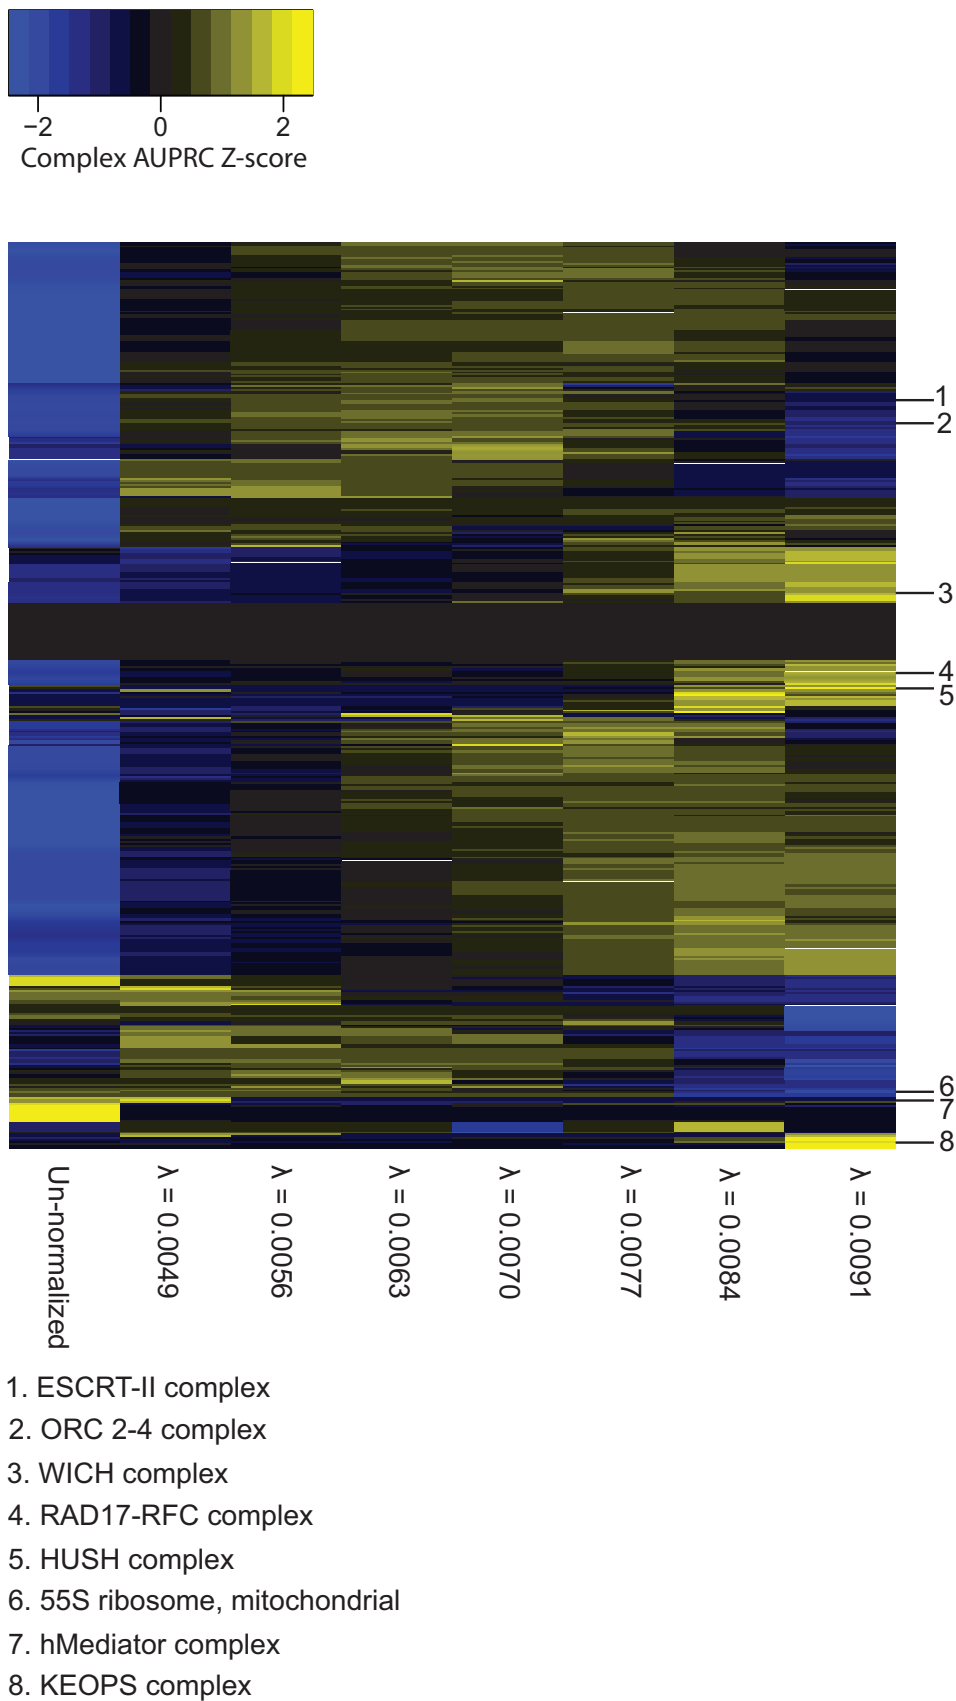

Figure EV2.

**Figure EV3. CORUM complex z-scores of AUPRC values for autoencoder normalization.**

AUPRC values per complex (rows) for the un-normalized DepMap 20Q2 data (Data ref: Broad DepMap, 2020) (far left column) compared to AE-normalized DepMap data with latent space size (LS) = 1, 2, 3, 4, 5, 10. AUPRC values have been z-score-normalized per row for visualization purposes.

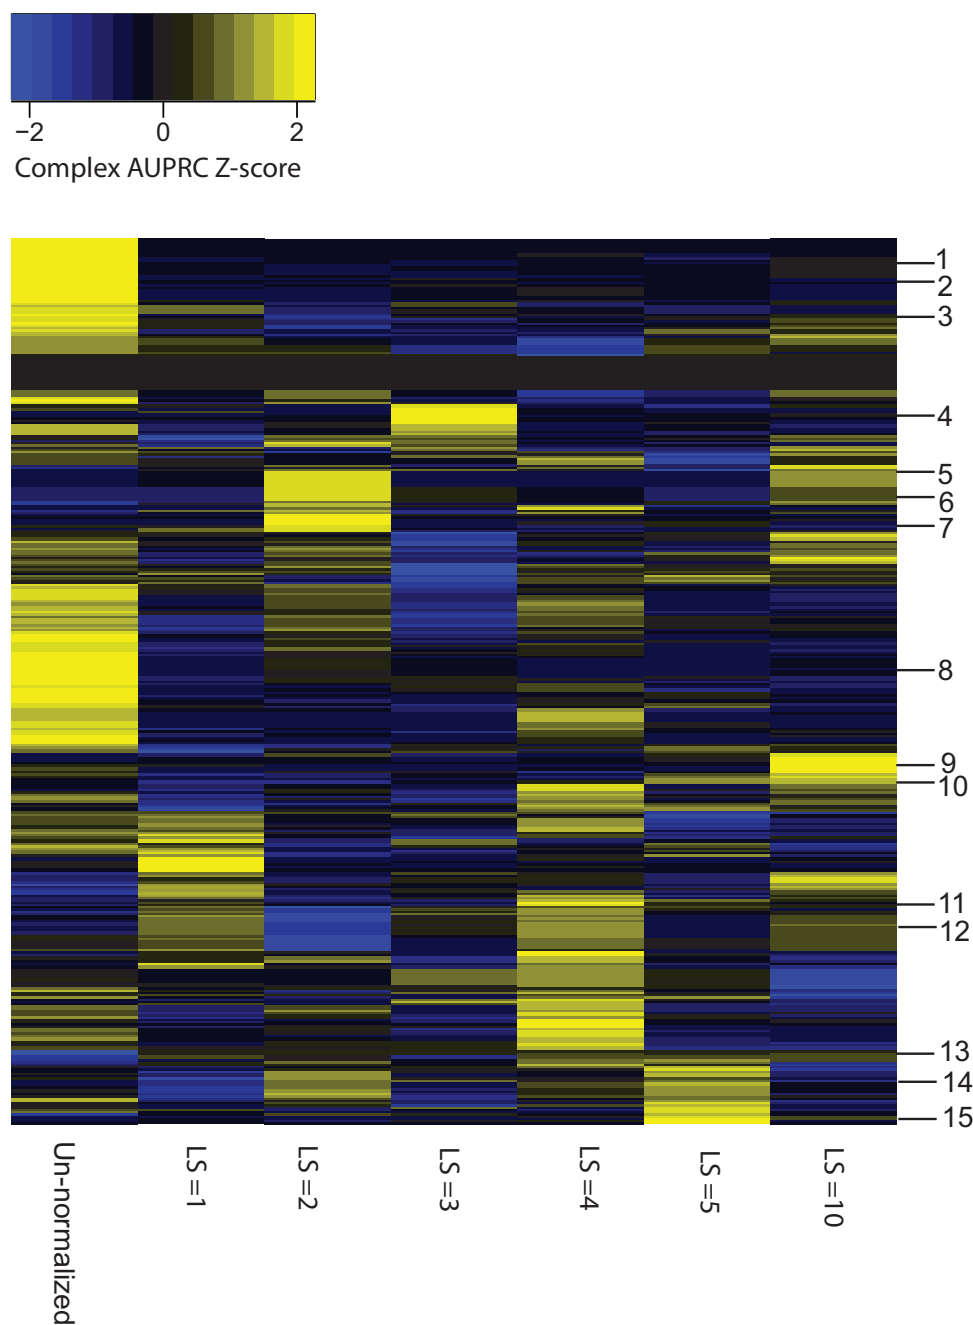

- |                                |                                          |
|--------------------------------|------------------------------------------|
| 1. 55S ribosome                | 9. KATNA1-KATNAL1-KATNB1-KATNBL1 complex |
| 2. 39S ribosomal subunit       | 10. Chromosomal passenger complex CPC    |
| 3. Respiratory chain complex   | 11. ANCO1-HDAC3 complex                  |
| 4. MBD1-MCAF1-SETDB1 complex   | 12. BAF complex                          |
| 5. DNA-PK-Ku complex           | 13. Wave-2 complex                       |
| 6. DNA ligase IV-XRCC4 complex | 14. PAC3-PAC4 complex                    |
| 7. LSm2-8 complex              | 15. FA complex                           |
| 8. mTOR complex                |                                          |

Figure EV3.

**Figure EV4. K-nearest neighbor classifier tissue-lineage prediction results comparing un-normalized and RPCO-normalized DepMap 20Q2 (Data ref: Broad DepMap, 2020) cell line similarity networks.**

- A Overall F1, Precision, and Recall scores (weighted mean across classes) across different values of  $K$  (x-axis). Dashed line represents the scores from a baseline random classifier.
- B Class-level (tissue-lineage) F1, Precision, and Recall scores for  $K = 5$  where x-axis depicts tissue lineage.

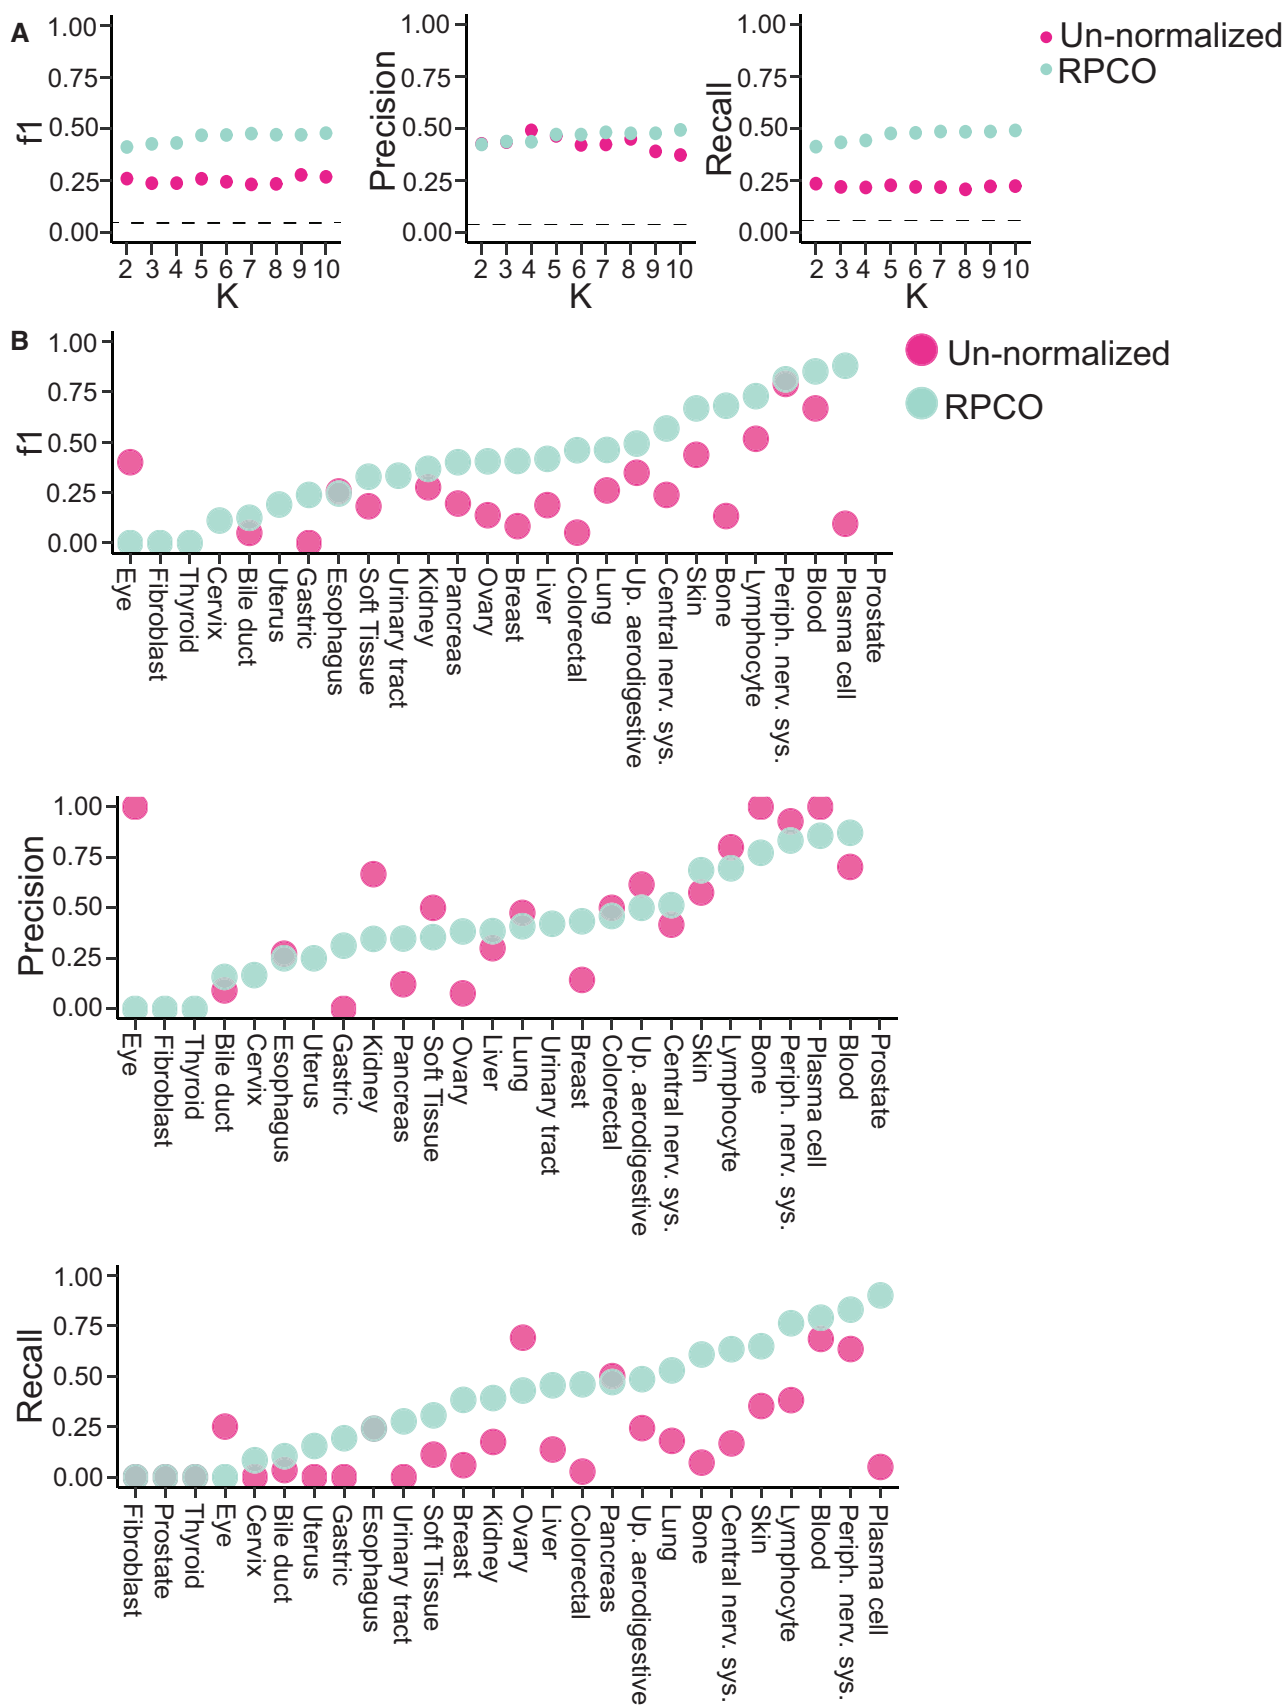

Figure EV4.



**Figure EV5.** Confusion matrix from  $K$ -nearest neighbor classifier ( $K = 5$ ) showing prediction results for each class (tissue lineage) of cell lines from un-normalized and RPCO-normalized DepMap 20Q2 (Data ref: Broad DepMap, 2020) cell line similarity networks. 

X- and y-axes are class labels. The top row depicts the true number of cell lines in each class, and the right-most column is the number of predicted cell lines for each class. The diagonal represents true positives. Each row represents false positives, and each column represents false negatives sans the diagonal entry.

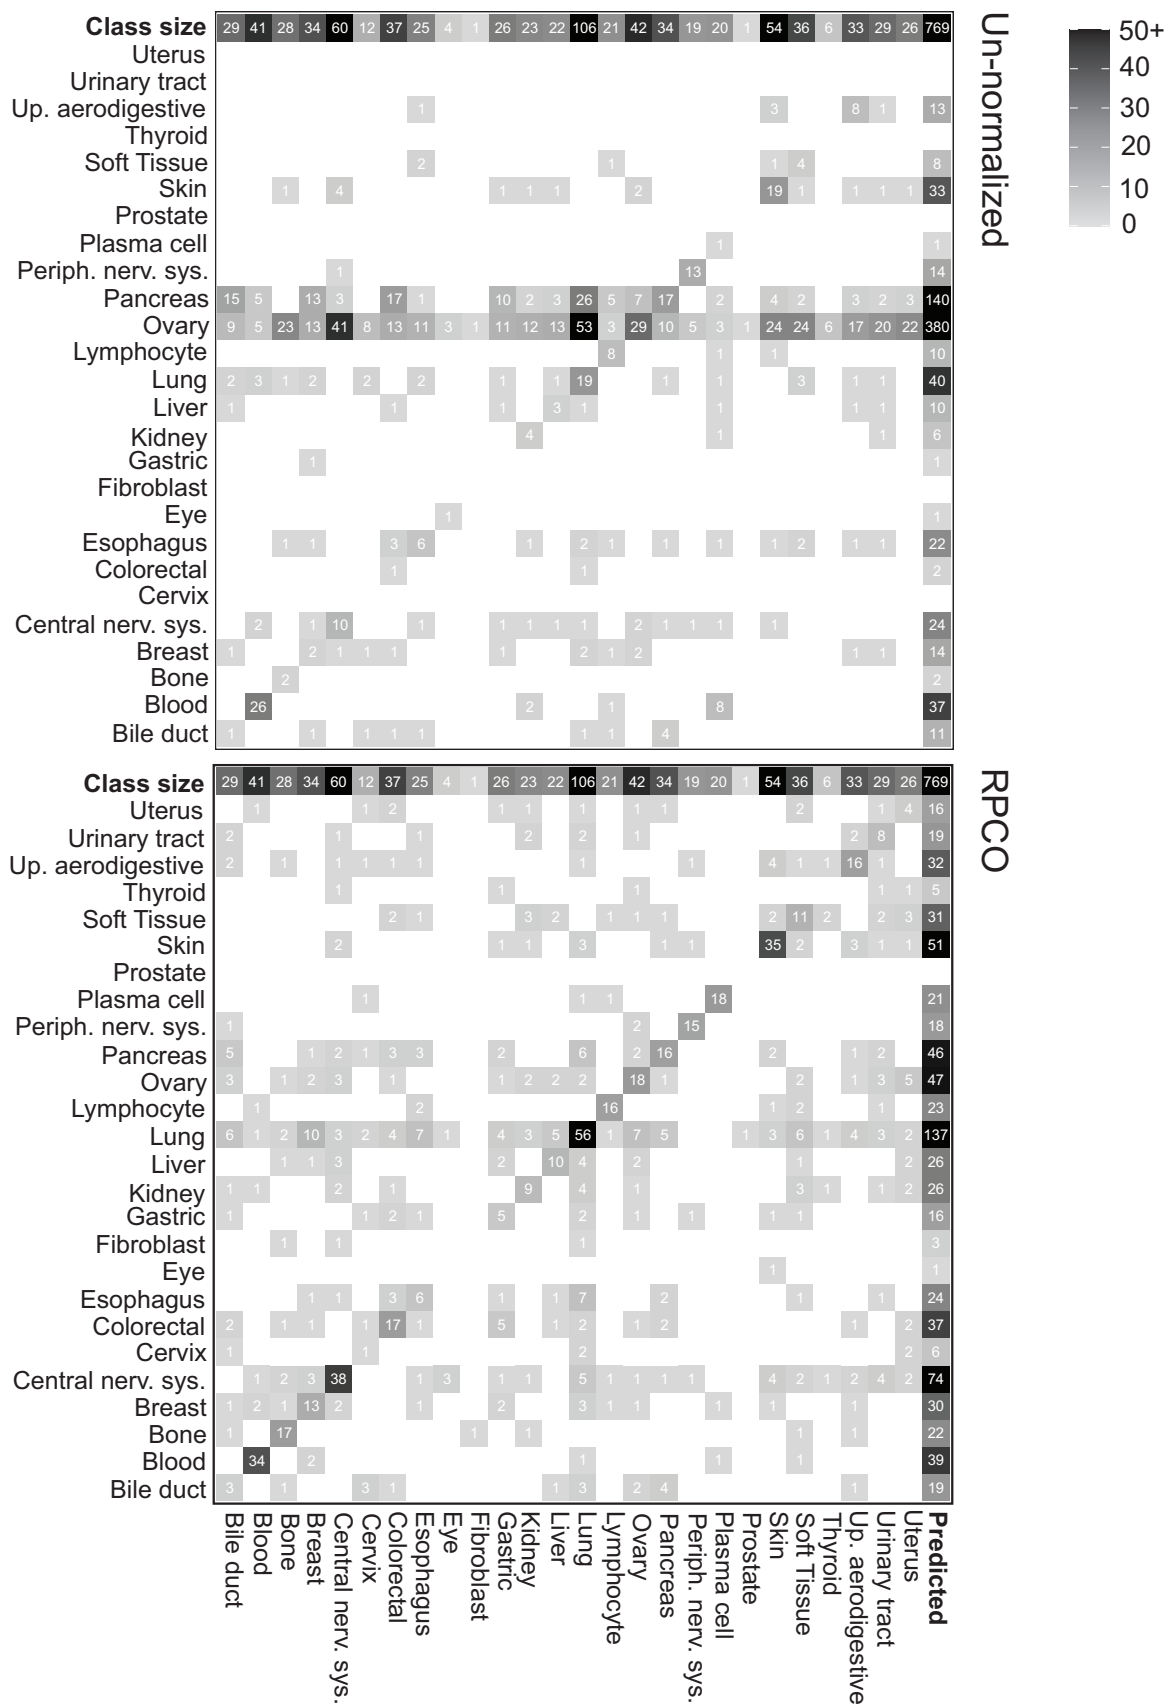

Figure EV5.
